# Supplementary material for: Boron Trifluoride Etherate Promoted Regioselective 3-Acylation of Indoles with Anhydrides
Source: MDPI journal article supplement (doi:10.3390/molecules27238281), 2022-11-28
Supplement: s1 [file s1]

## SUPPORTING INFORMATION

### **Boron Trifluoride Etherate Promoted Regioselective 3-Acylation of Indoles with Anhydrides**

Yunyun Zheng, Jiuling Li \* and Kai Wei \*

Henan Engineering Research Center of Funiu Mountain's Medical Resources  
Utilization and Molecular Medicine, School of Medical Sciences, Pingdingshan  
University, Pingdingshan 467000, China

\* Correspondence: orgchem90@163.com (J.L.); weikai1987@126.com (K.W.)

## Optimization of Lewis acids

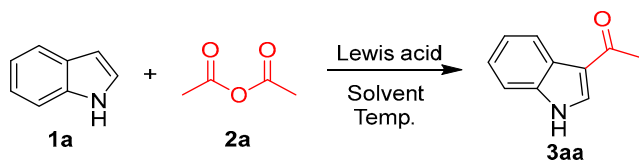

## Optimization of Lewis acids

| Entry | <b>2a</b> (eq.) | Lewis acid<br>(1 eq.)              | Solvent | Temp. | Time (h) | Yield (%) |
|-------|-----------------|------------------------------------|---------|-------|----------|-----------|
| 1     | 1.2             | Sm(OTf) <sub>3</sub>               | DCM     | rt    | 2        | nr        |
| 2     | 1.2             | Ce(OTf) <sub>4</sub>               | DCM     | rt    | 2        | nr        |
| 3     | 1.2             | FeCl <sub>3</sub>                  | DCM     | rt    | 2        | 75        |
| 4     | 1.2             | Fe(OTf) <sub>3</sub>               | DCM     | rt    | 2        | 60        |
| 5     | 1.2             | SmCl <sub>3</sub>                  | DCM     | rt    | 2        | np        |
| 6     | 1.2             | CeCl <sub>3</sub>                  | DCM     | rt    | 2        | np        |
| 7     | 1.2             | InCl <sub>3</sub>                  | DCM     | rt    | 2        | 65        |
| 8     | 1.2             | CuCl <sub>2</sub>                  | DCM     | rt    | 2        | 35        |
| 9     | 1.2             | BF <sub>3</sub> ·Et <sub>2</sub> O | DCM     | rt    | 2        | 81        |

Reaction conditions unless noted otherwise: **1a** (0.5 mmol), solvent (1.5 mL), np: no product, nr: no reaction.

At the beginning of this work, we have investigated different lewis acids of the reaction conditions. We could see that the acylation procedure catalyzed by FeCl<sub>3</sub>, Fe(OTf)<sub>3</sub> and InCl<sub>3</sub> could give the 3-acylindole in 75%, 60% and 65% yields, respectively (Entries 3, 7 and 4). This reaction had a yield of only 35% when catalyzed by CuCl<sub>2</sub>. In addition, Under the catalysis of Sm(OTf)<sub>3</sub> and Ce(OTf)<sub>4</sub>, the reaction could not occur. No desired product was achieved catalyzed by SmCl<sub>3</sub> and CeCl<sub>3</sub>. The yield of 3-acylindole **3aa** achieved 81% in the presence of BF<sub>3</sub>·Et<sub>2</sub>O.

**$^1\text{H}$  NMR spectra (500 MHz,  $\text{DMSO-}d_6$ ) of 3aa**

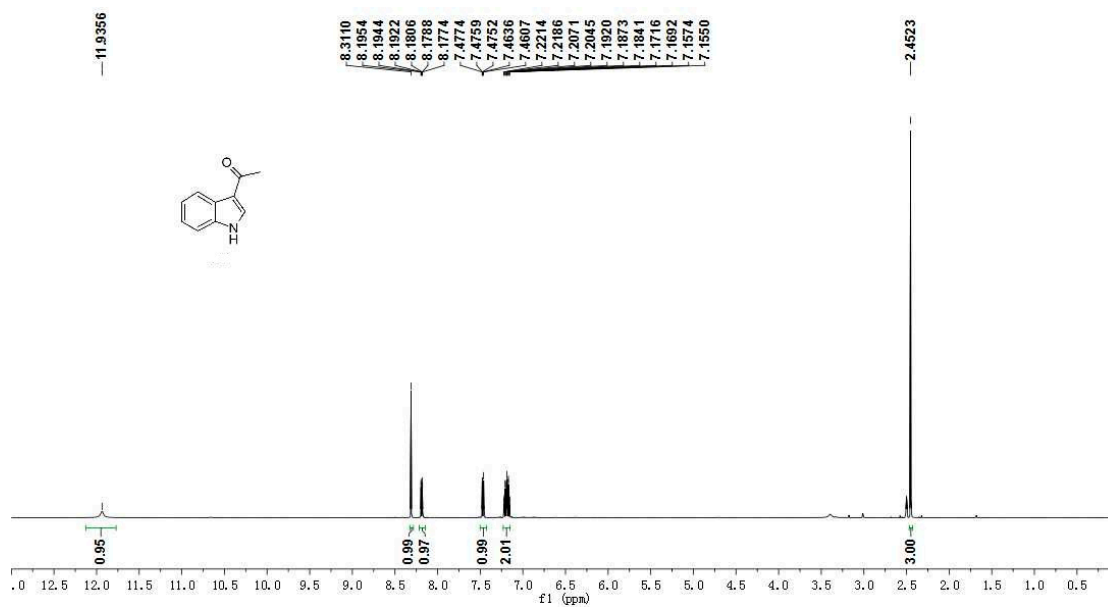

**$^{13}\text{C}$  NMR spectra (125 MHz,  $\text{DMSO-}d_6$ ) of 3aa**

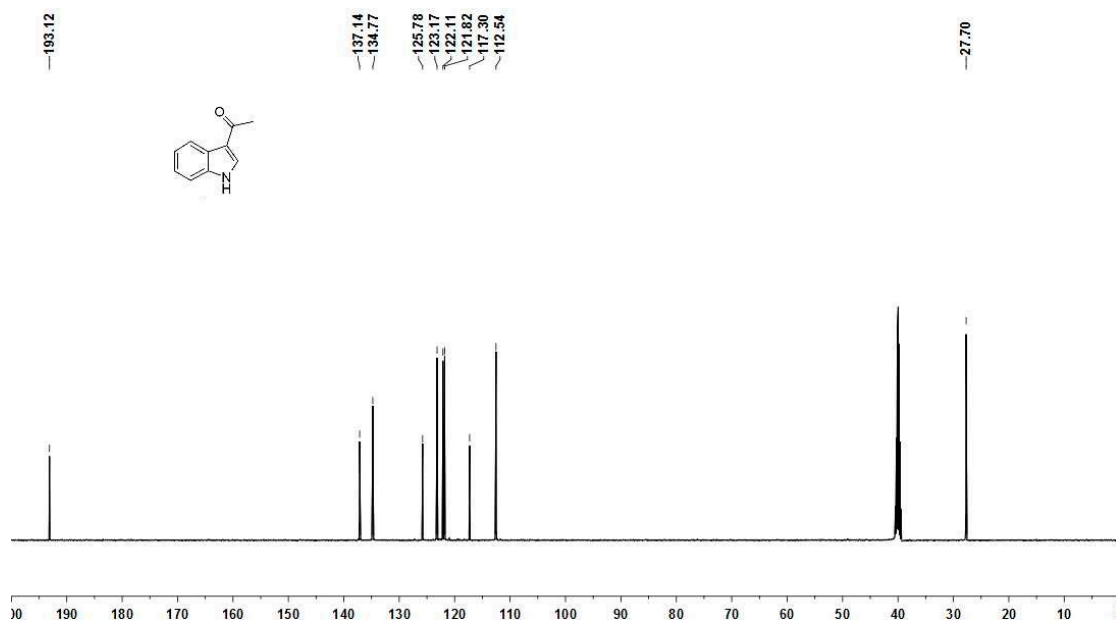

**$^1\text{H}$  NMR spectra (500 MHz,  $\text{DMSO-}d_6$ ) of 3ab**

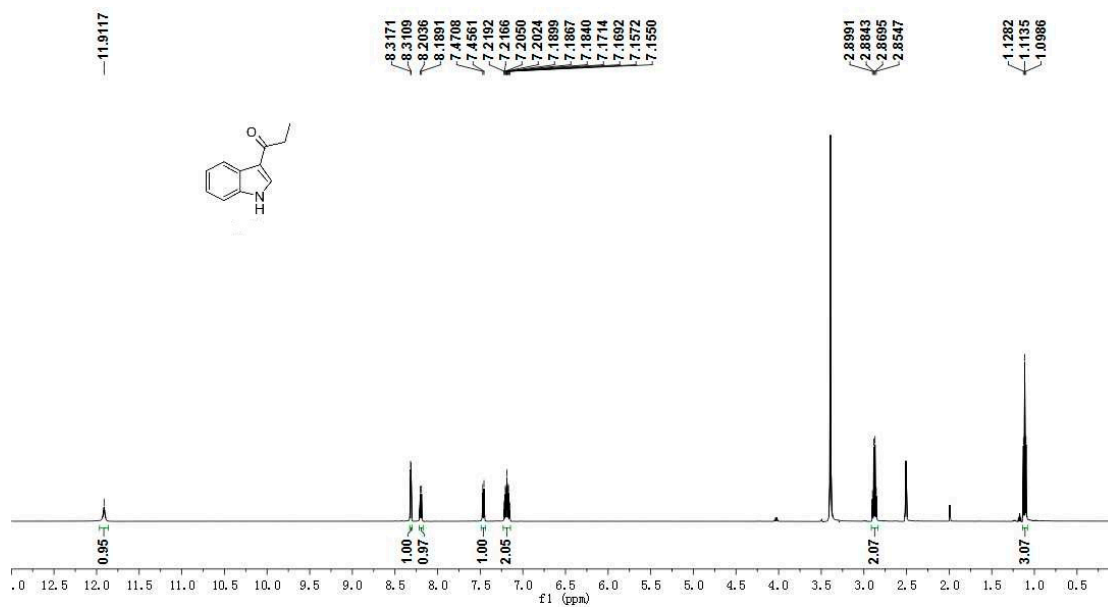

**$^{13}\text{C}$  NMR spectra (125 MHz,  $\text{DMSO-}d_6$ ) of 3ab**

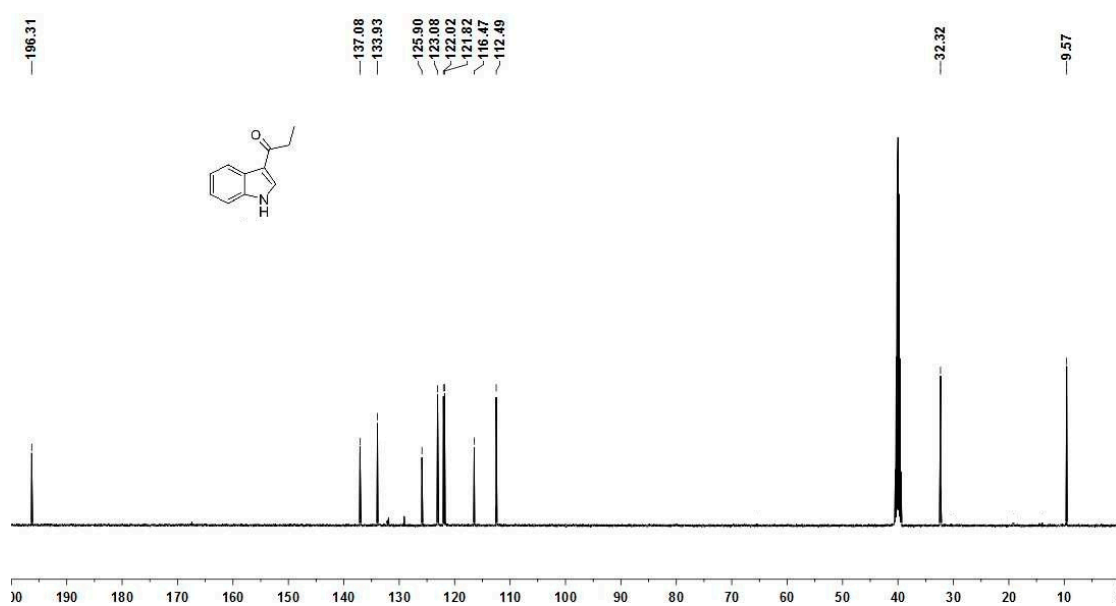



**$^1\text{H}$  NMR spectra (500 MHz,  $\text{DMSO-}d_6$ ) of 3ac**

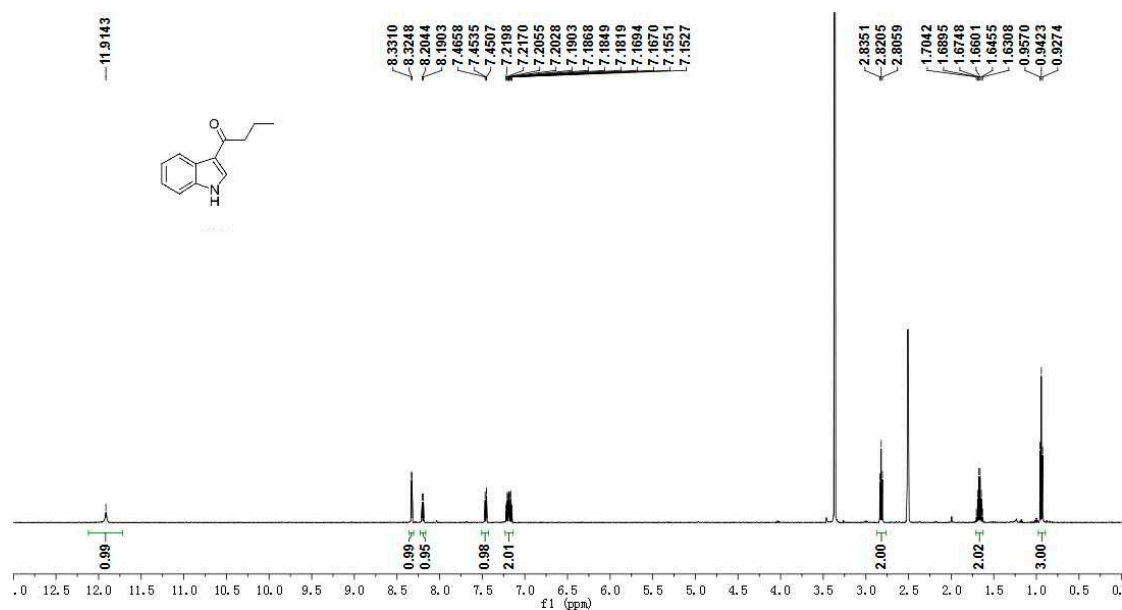

**$^{13}\text{C}$  NMR spectra (125 MHz,  $\text{DMSO-}d_6$ ) of 3ac**

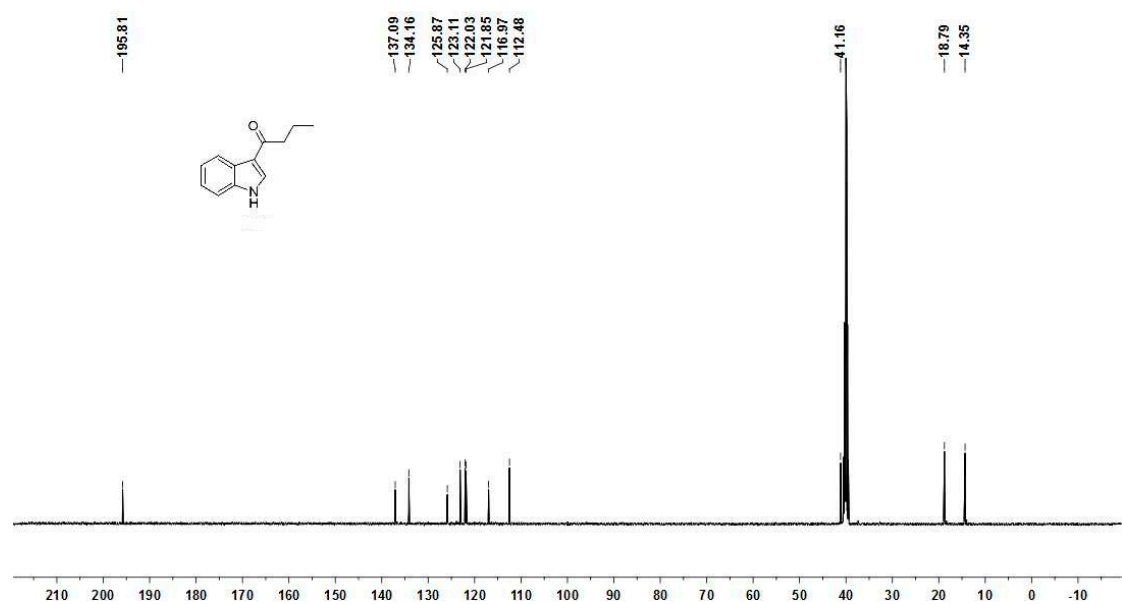

**$^1\text{H}$  NMR spectra (500 MHz,  $\text{DMSO-}d_6$ ) of 3ad**

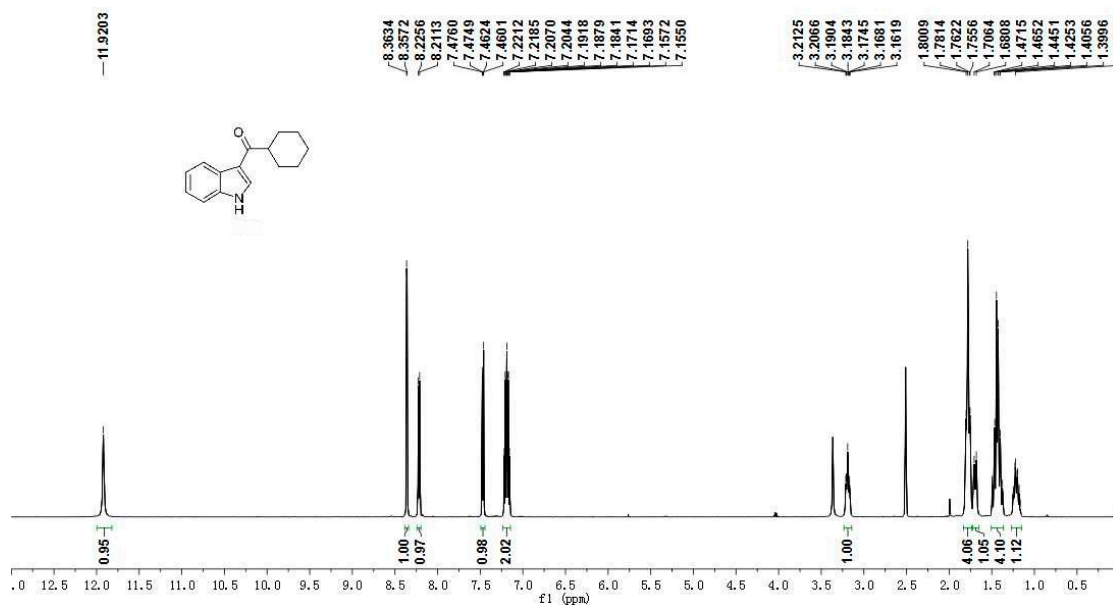

**$^{13}\text{C}$  NMR spectra (125 MHz,  $\text{DMSO-}d_6$ ) of 3ad**

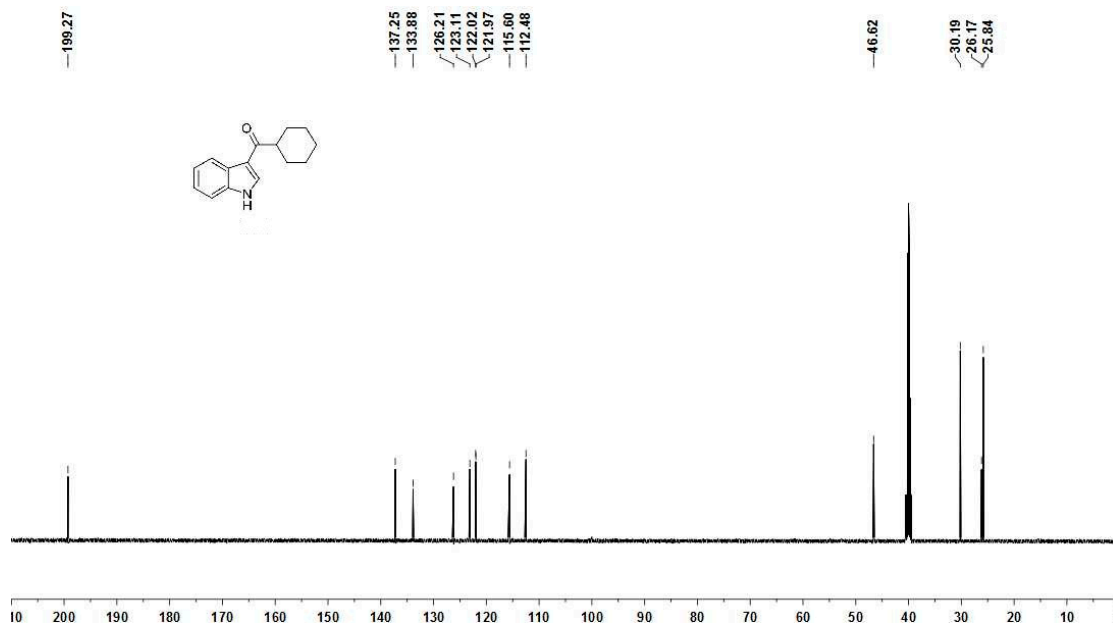

**<sup>1</sup>H NMR spectra (500 MHz, DMSO-*d*<sub>6</sub>) of 3ae**

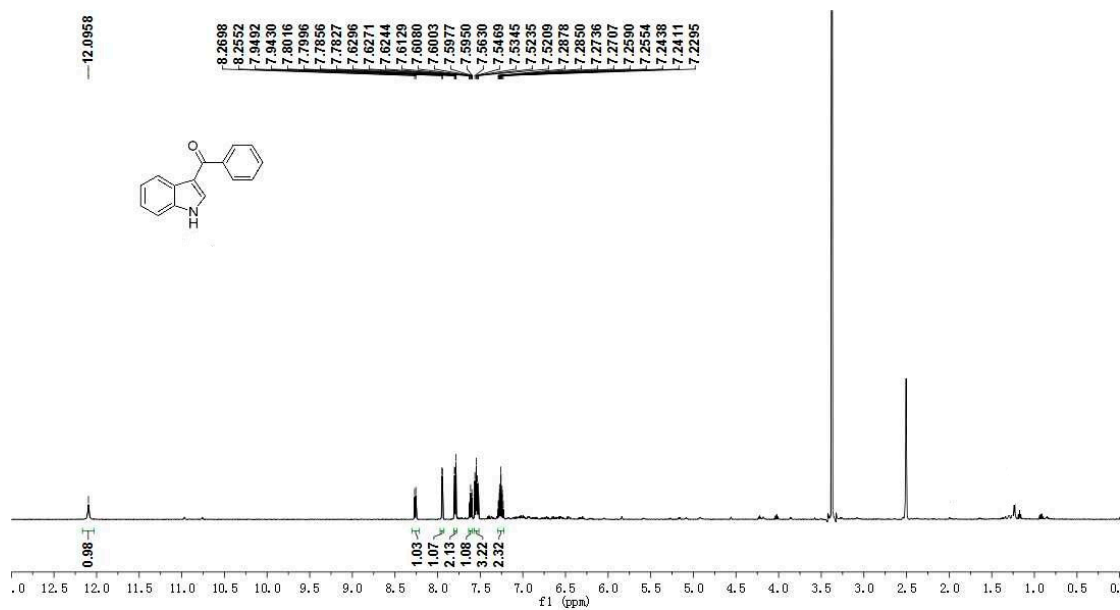

**<sup>13</sup>C NMR spectra (125 MHz, DMSO-*d*<sub>6</sub>) of 3ae**

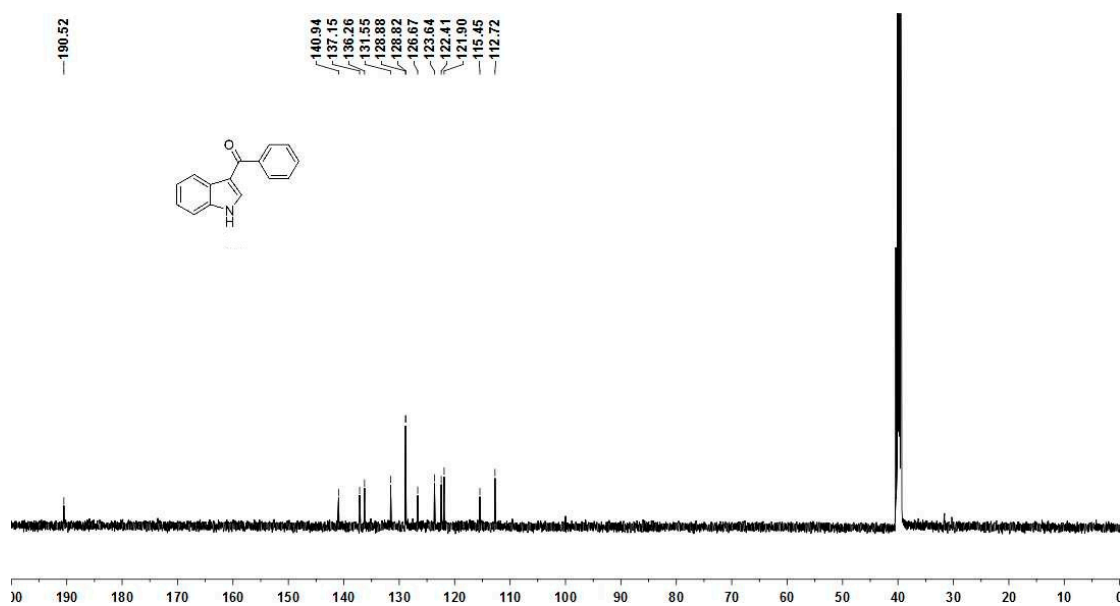

**<sup>1</sup>H NMR spectra (500 MHz, DMSO-*d*<sub>6</sub>) of 3af**

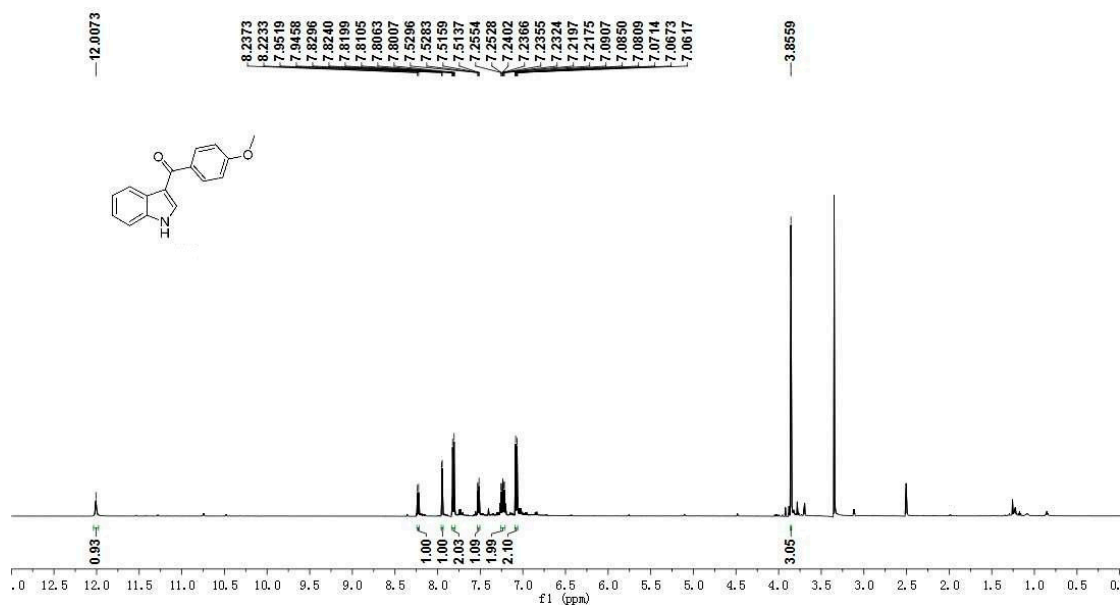

**<sup>13</sup>C NMR spectra (125 MHz, DMSO-*d*<sub>6</sub>) of 3af**

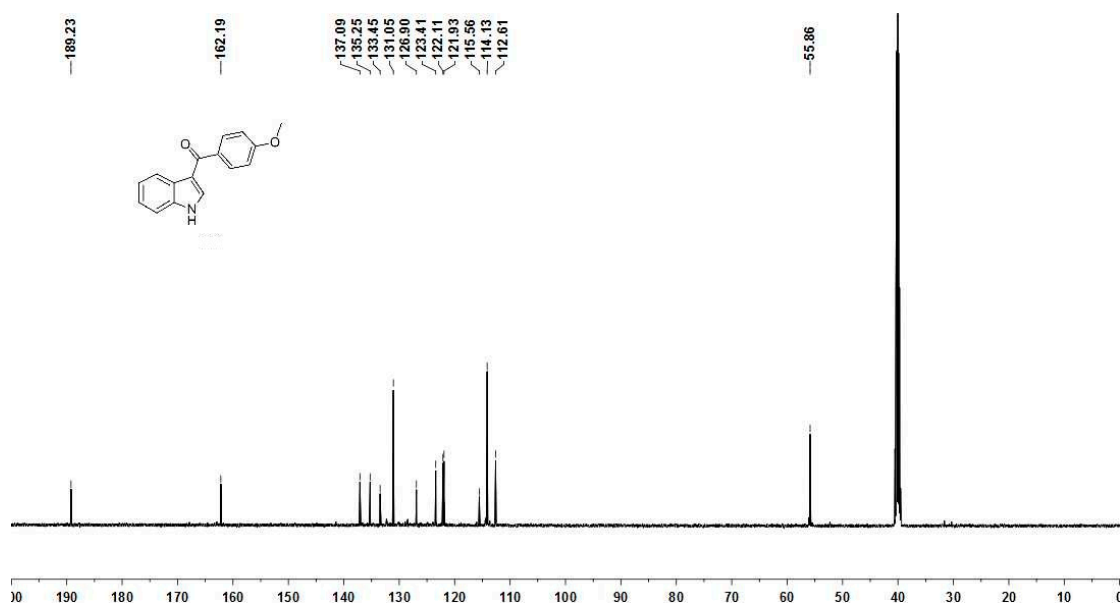

**$^1\text{H}$  NMR spectra (500 MHz,  $\text{DMSO-}d_6$ ) of 3ag**

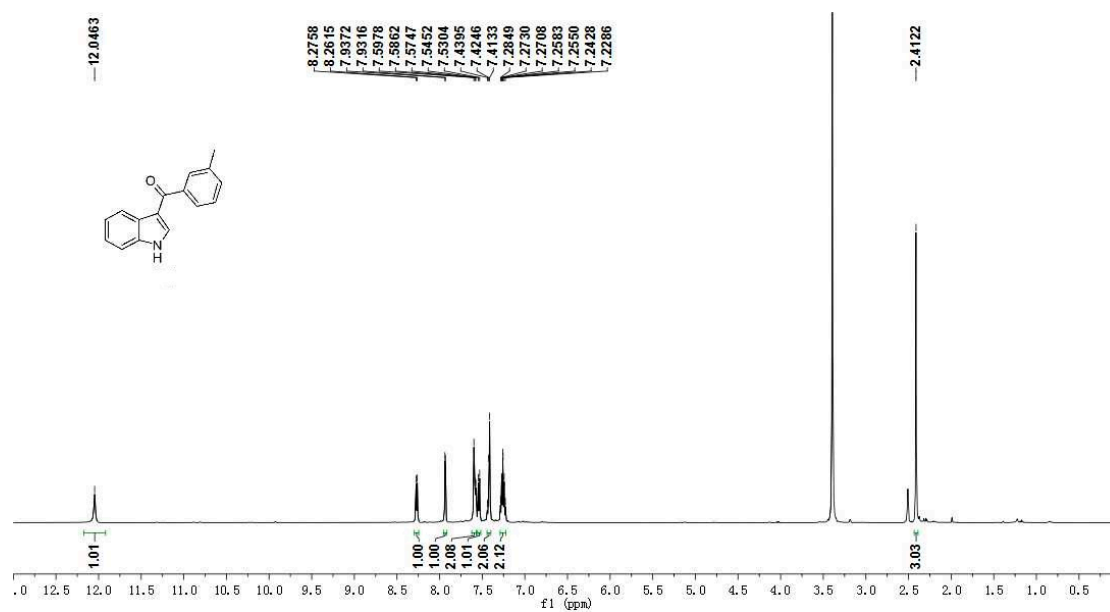

**$^{13}\text{C}$  NMR spectra (125 MHz,  $\text{DMSO-}d_6$ ) of 3ag**

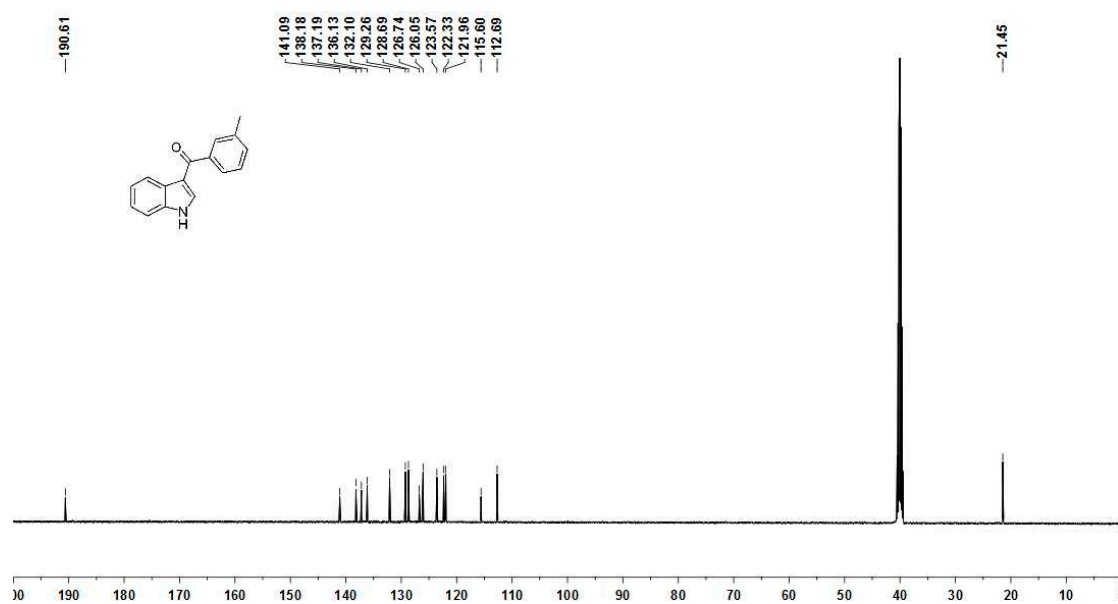

**$^1\text{H}$  NMR spectra (500 MHz,  $\text{DMSO-}d_6$ ) of 3ba**

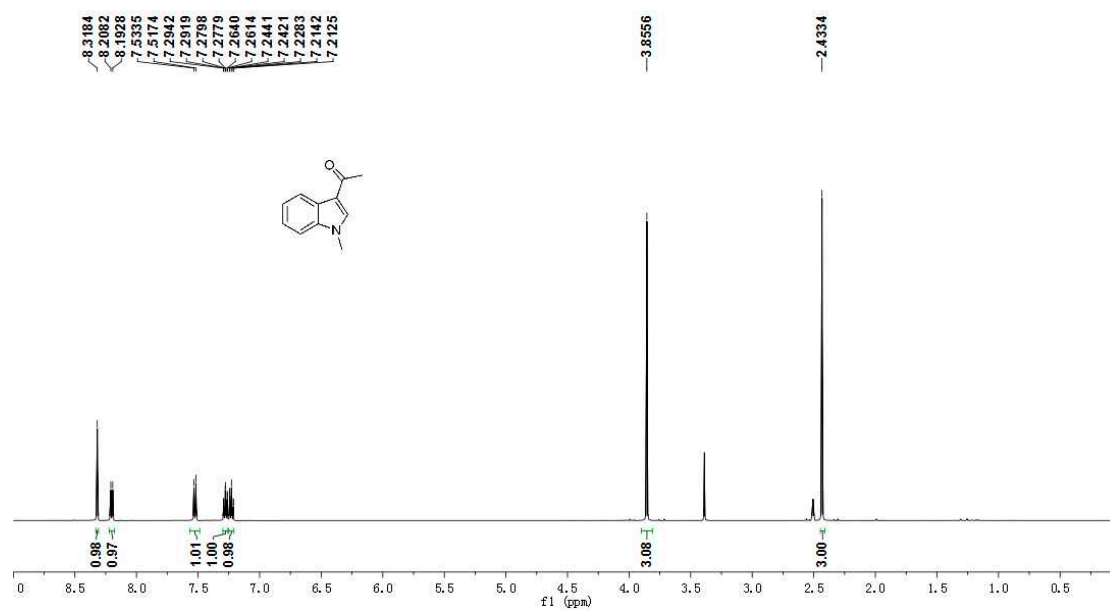

**$^{13}\text{C}$  NMR spectra (125 MHz,  $\text{DMSO-}d_6$ ) of 3ba**

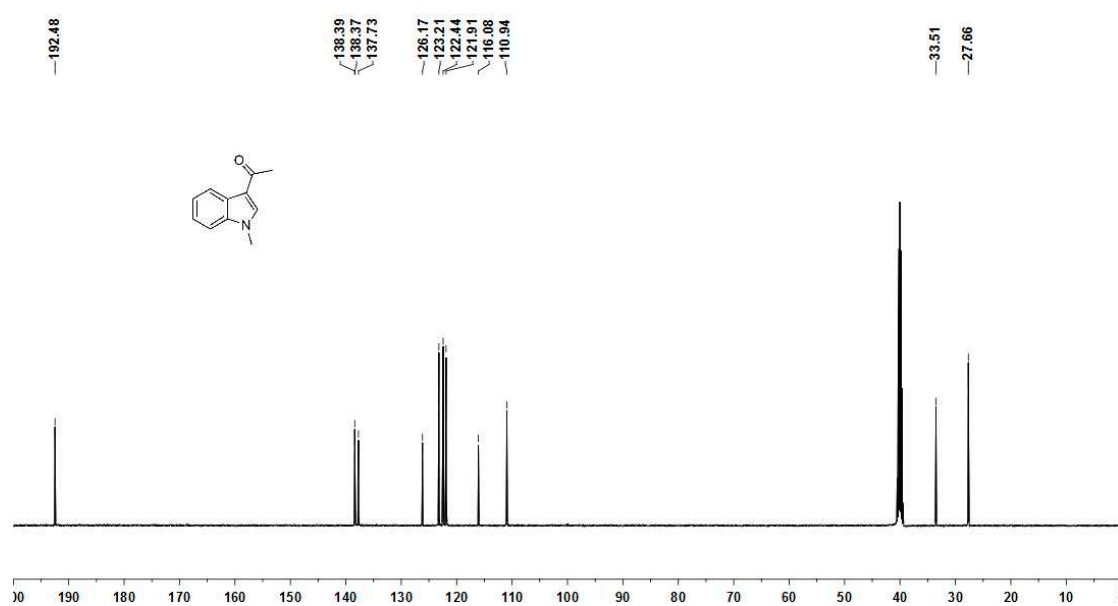

**$^1\text{H}$  NMR spectra (500 MHz,  $\text{DMSO}-d_6$ ) of 3bb**

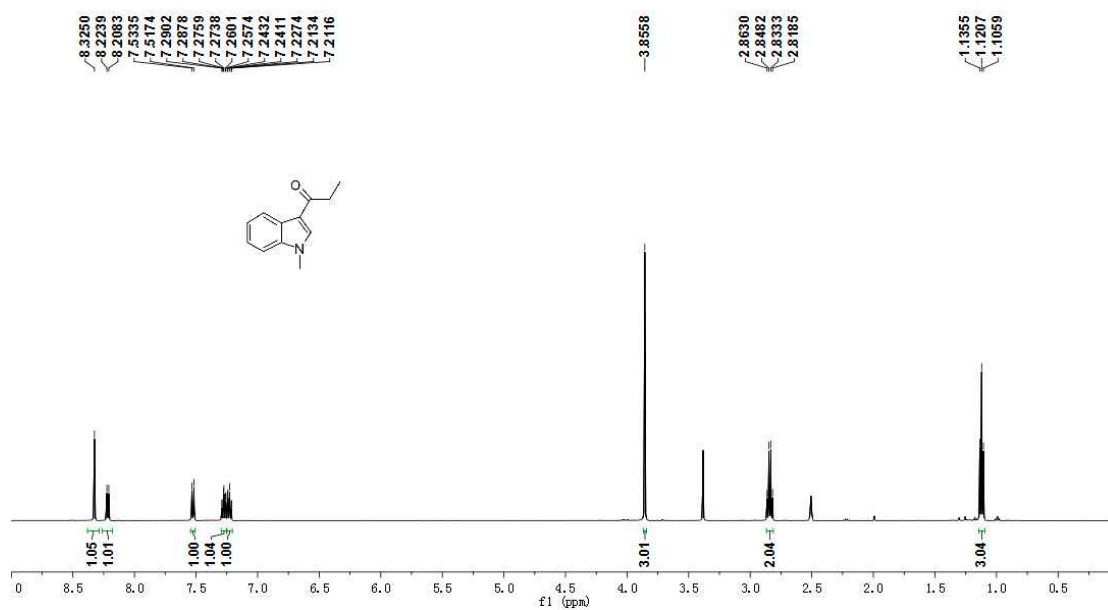

**$^{13}\text{C}$  NMR spectra (125 MHz,  $\text{DMSO}-d_6$ ) of 3bb**

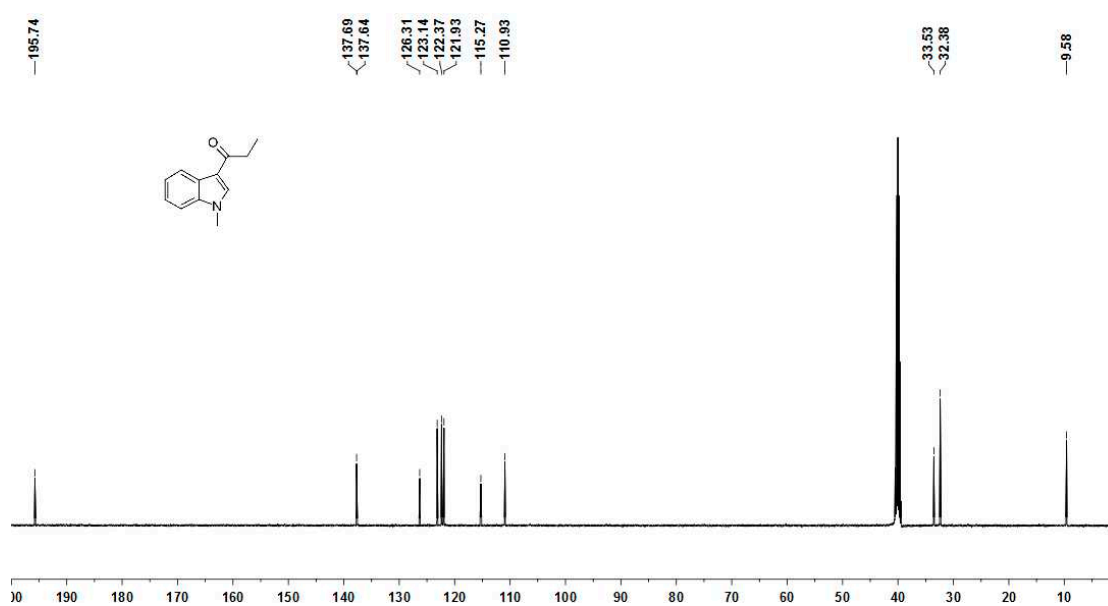

**<sup>1</sup>H NMR spectra (500 MHz, DMSO-*d*<sub>6</sub>) of 3bc**

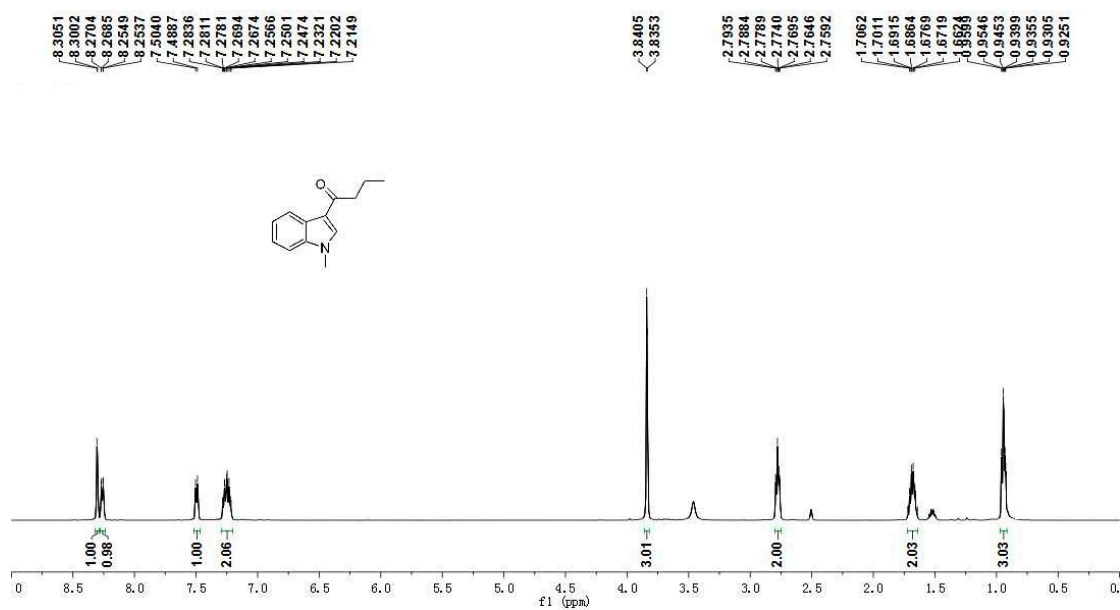

**<sup>13</sup>C NMR spectra (125 MHz, DMSO-*d*<sub>6</sub>) of 3bc**

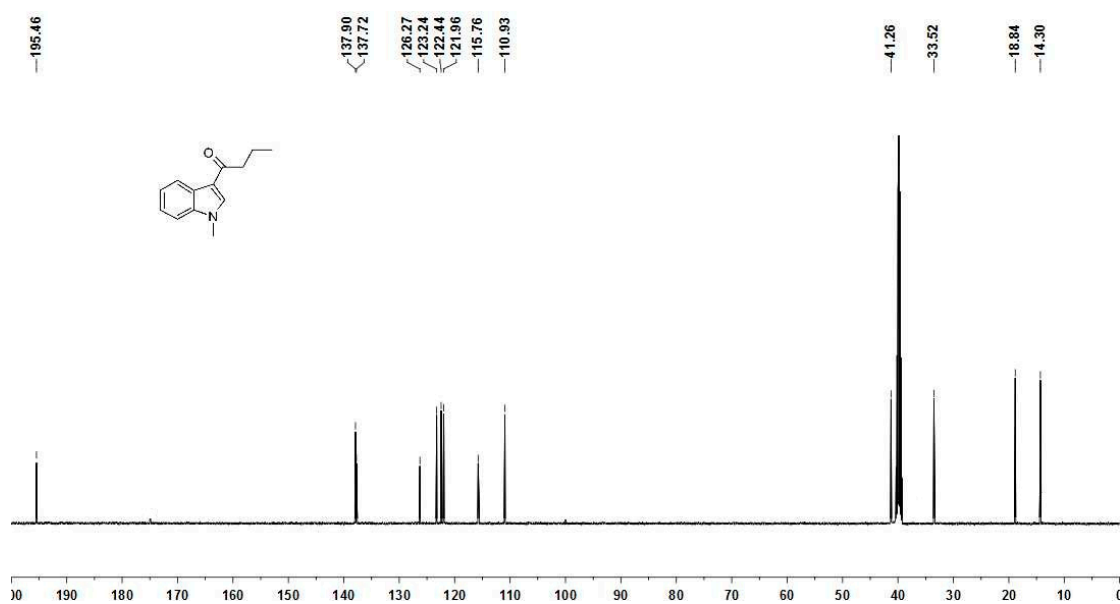



**<sup>1</sup>H NMR spectra (500 MHz, DMSO-*d*<sub>6</sub>) of 3bd**

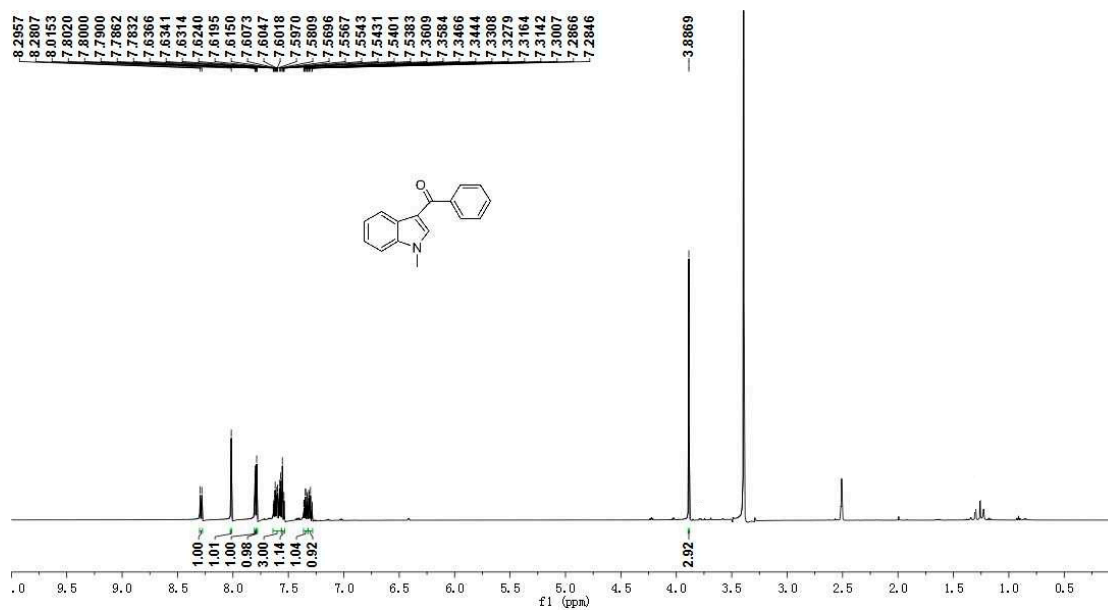

**<sup>13</sup>C NMR spectra (125 MHz, DMSO-*d*<sub>6</sub>) of 3bd**

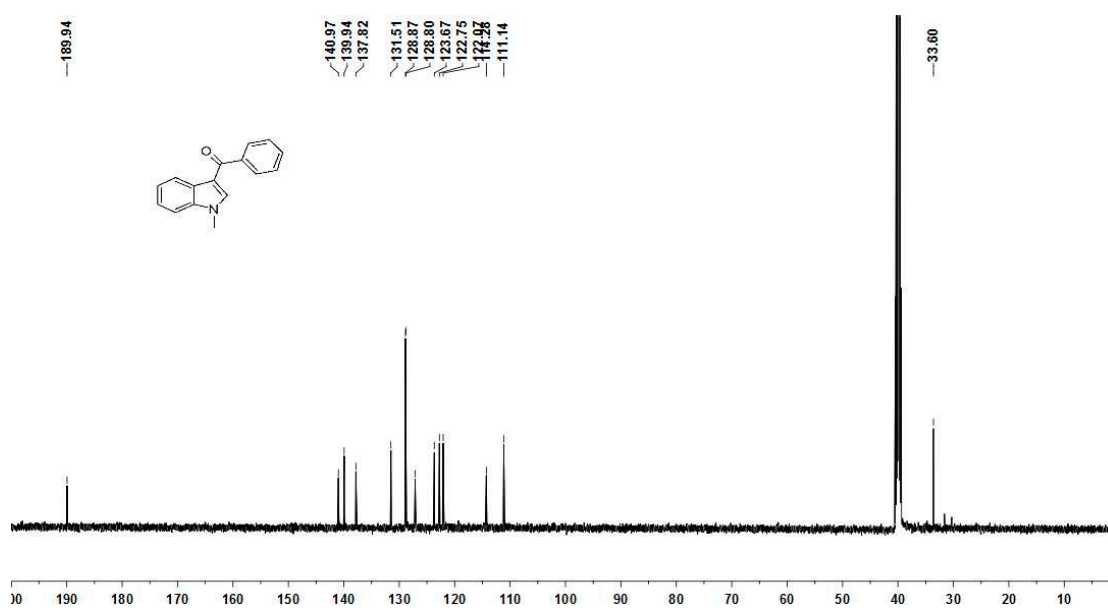

**<sup>1</sup>H NMR spectra (500 MHz, DMSO-*d*<sub>6</sub>) of 3ca**

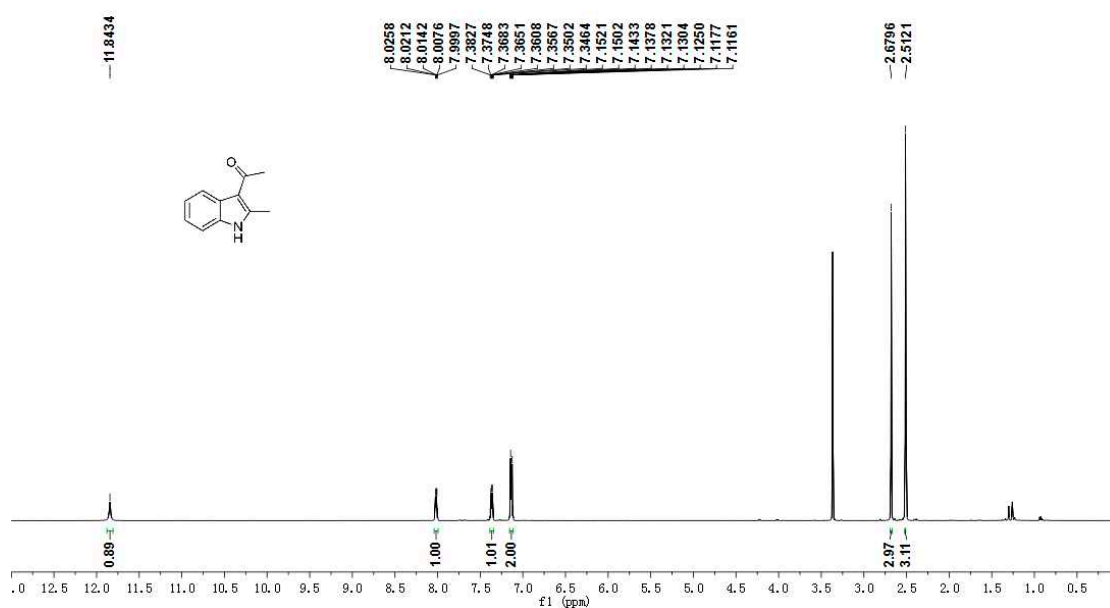

**<sup>13</sup>C NMR spectra (125 MHz, DMSO-*d*<sub>6</sub>) of 3ca**

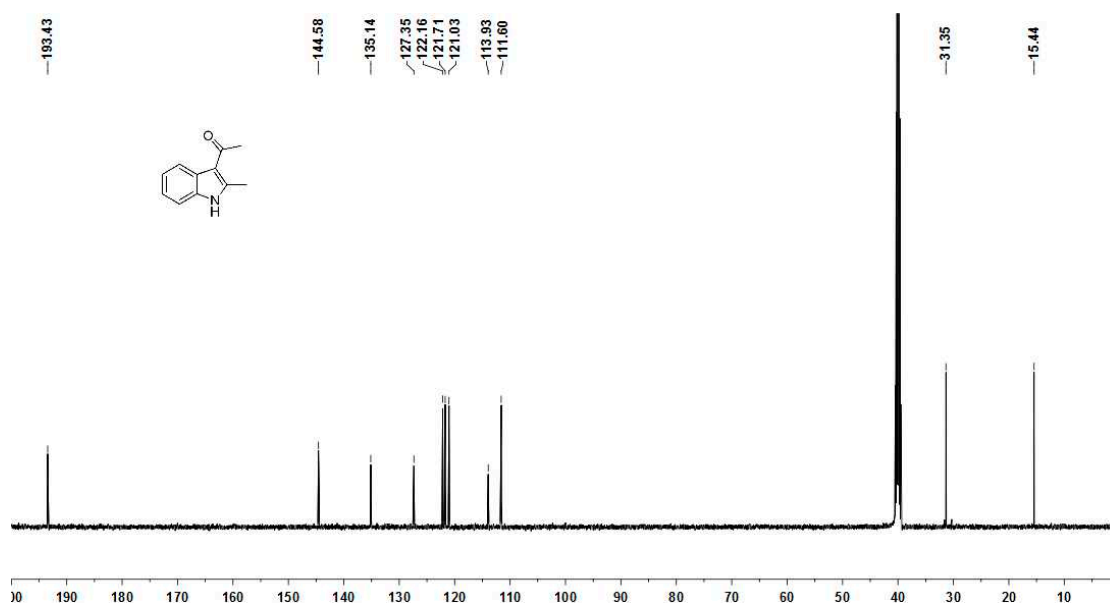

**$^1\text{H}$  NMR spectra (500 MHz,  $\text{DMSO-}d_6$ ) of 3cb**

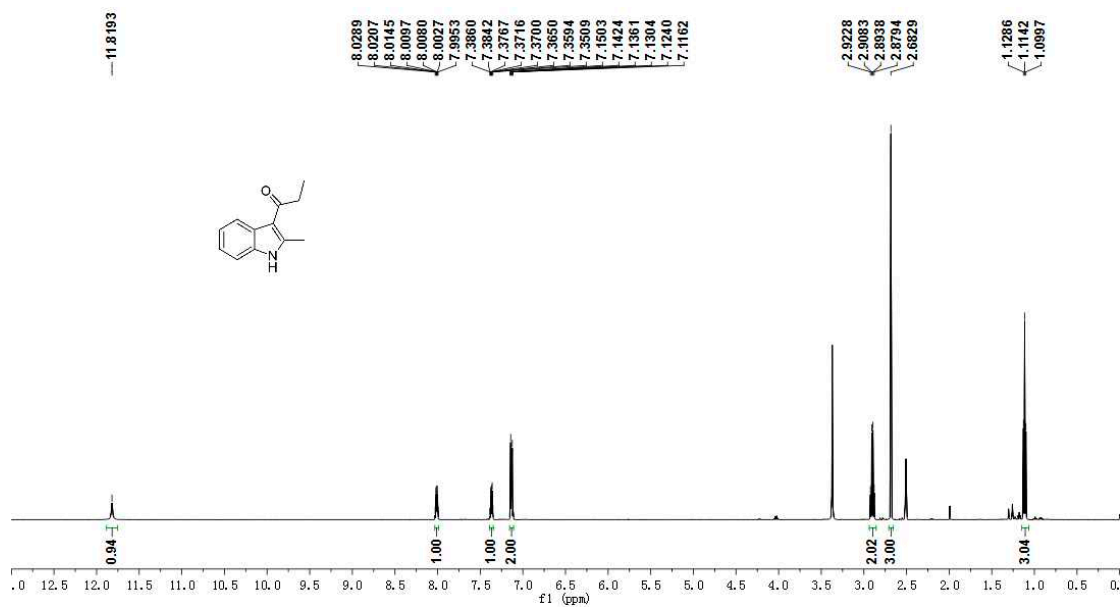

**$^{13}\text{C}$  NMR spectra (125 MHz,  $\text{DMSO-}d_6$ ) of 3cb**

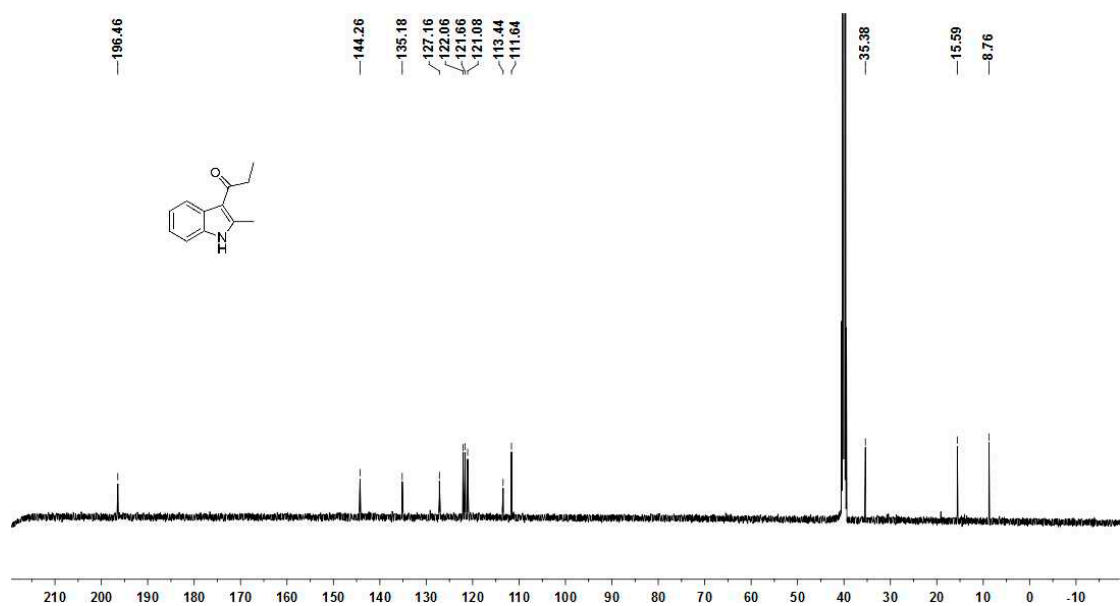

<sup>1</sup>H NMR spectra (500 MHz, DMSO-*d*<sub>6</sub>) of 3cc

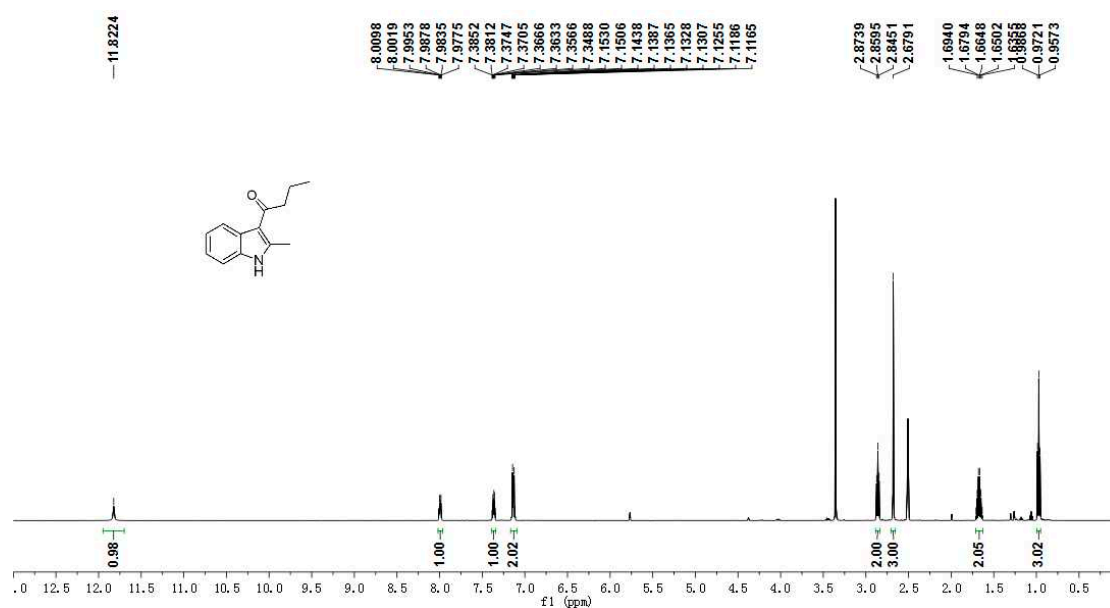

<sup>13</sup>C NMR spectra (125 MHz, DMSO-*d*<sub>6</sub>) of 3cc

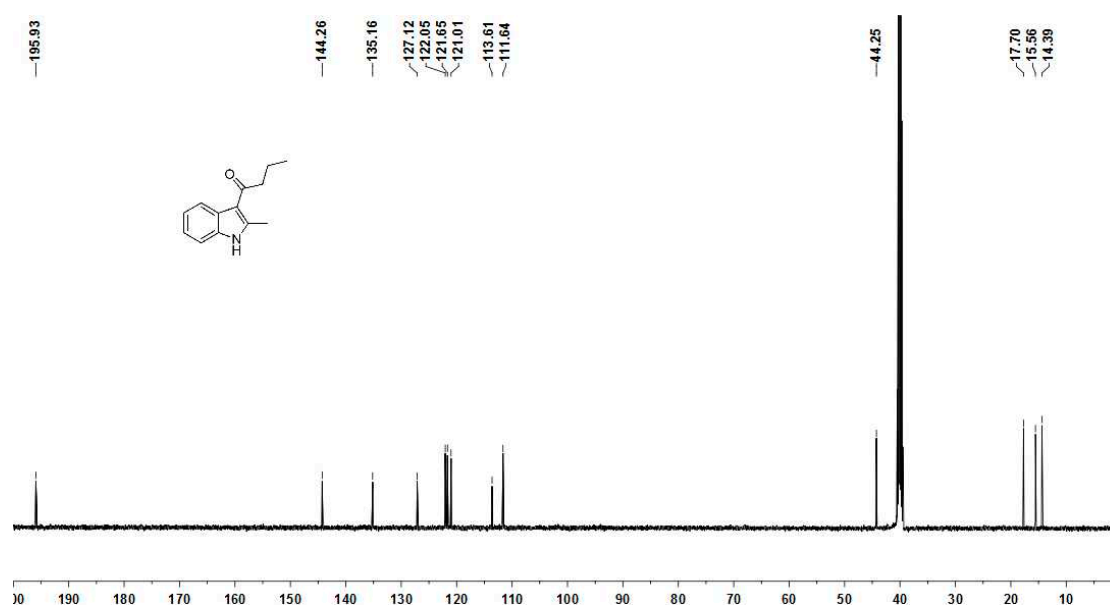

**<sup>1</sup>H NMR spectra (500 MHz, DMSO-*d*<sub>6</sub>) of 3cd**

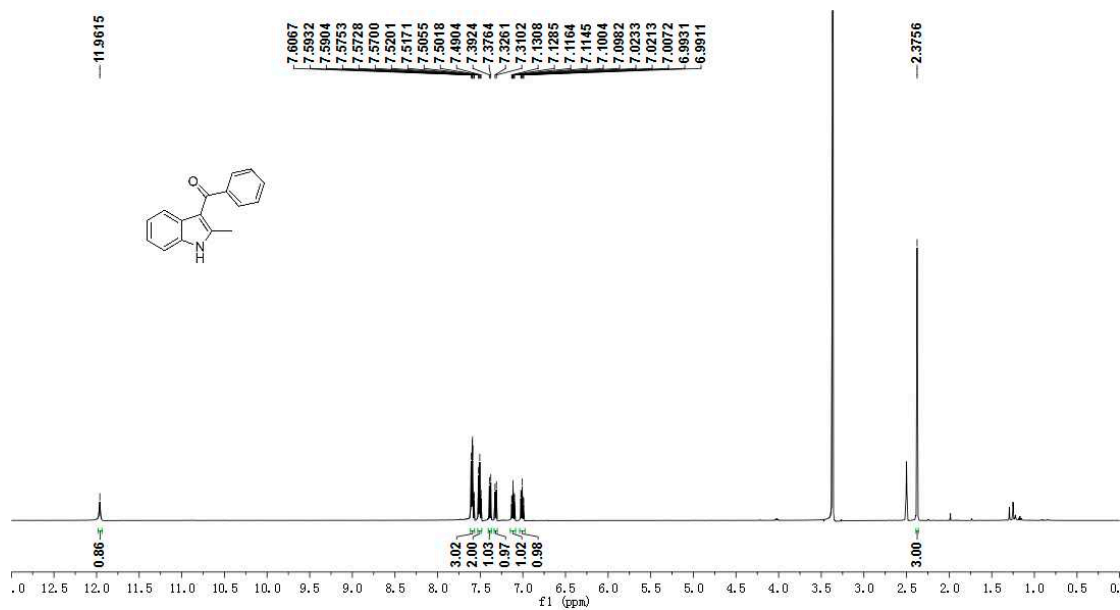

**<sup>13</sup>C NMR spectra (125 MHz, DMSO-*d*<sub>6</sub>) of 3cd**

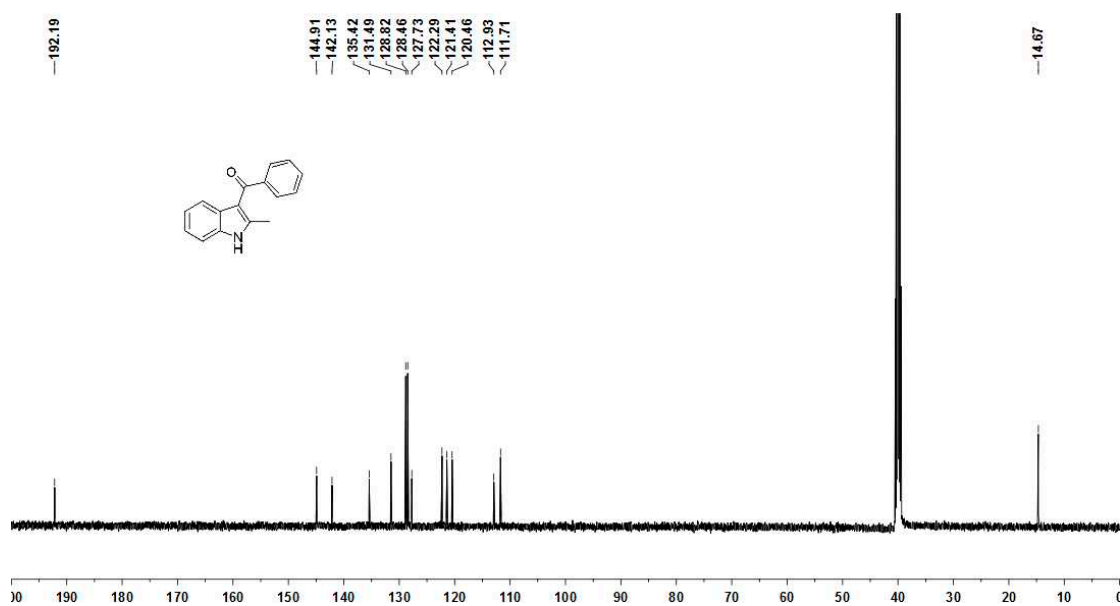

**$^1\text{H}$  NMR spectra (500 MHz,  $\text{DMSO-}d_6$ ) of 3da**

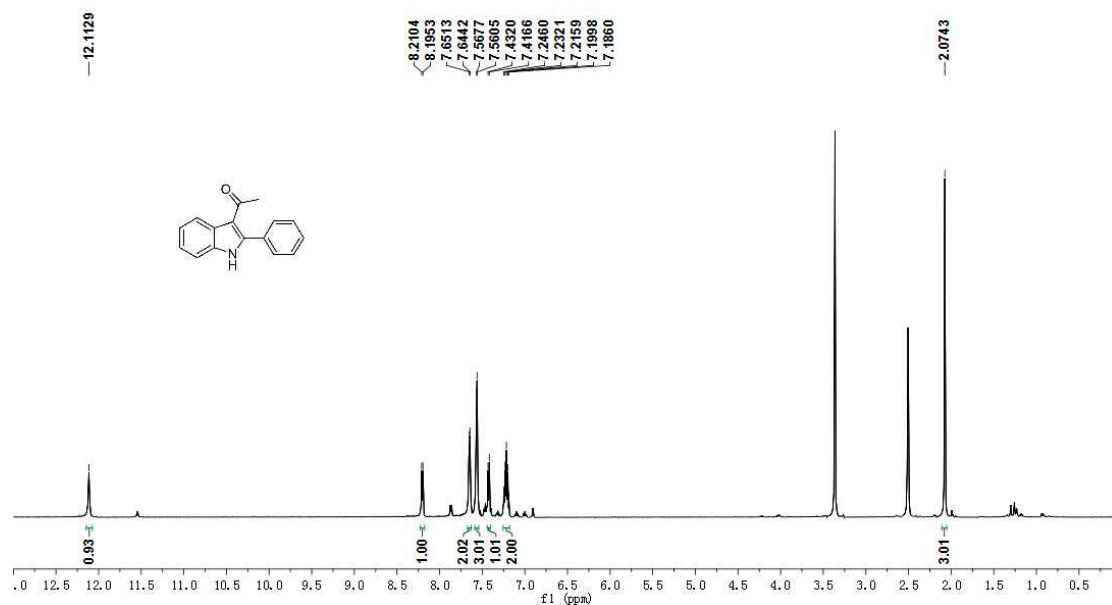

**$^{13}\text{C}$  NMR spectra (125 MHz,  $\text{DMSO-}d_6$ ) of 3da**

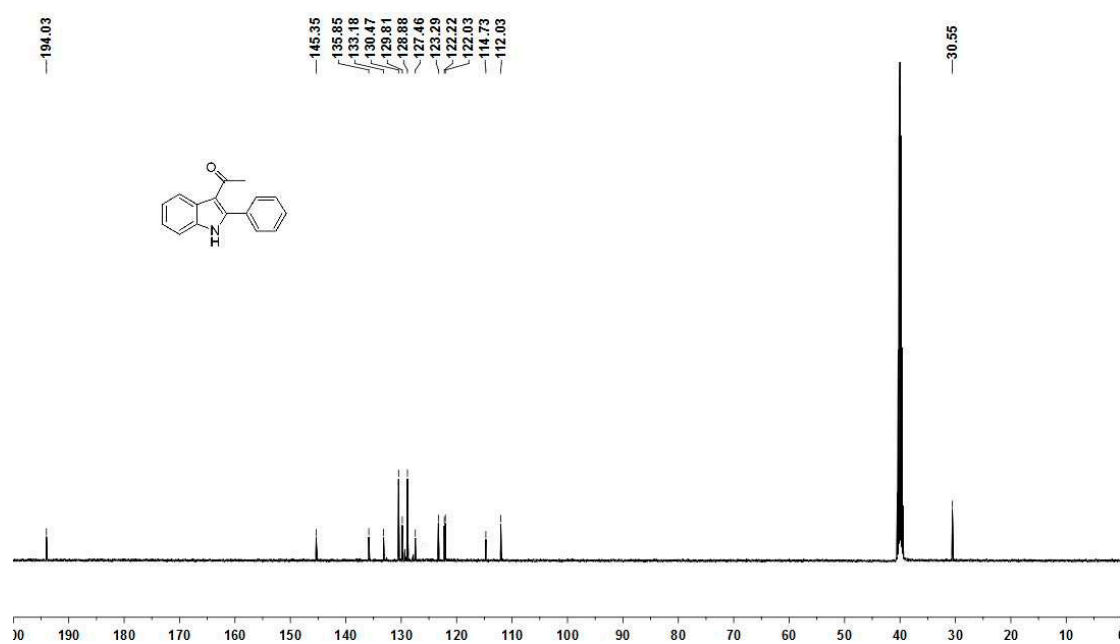

**<sup>1</sup>H NMR spectra (500 MHz, DMSO-*d*<sub>6</sub>) of 3db**

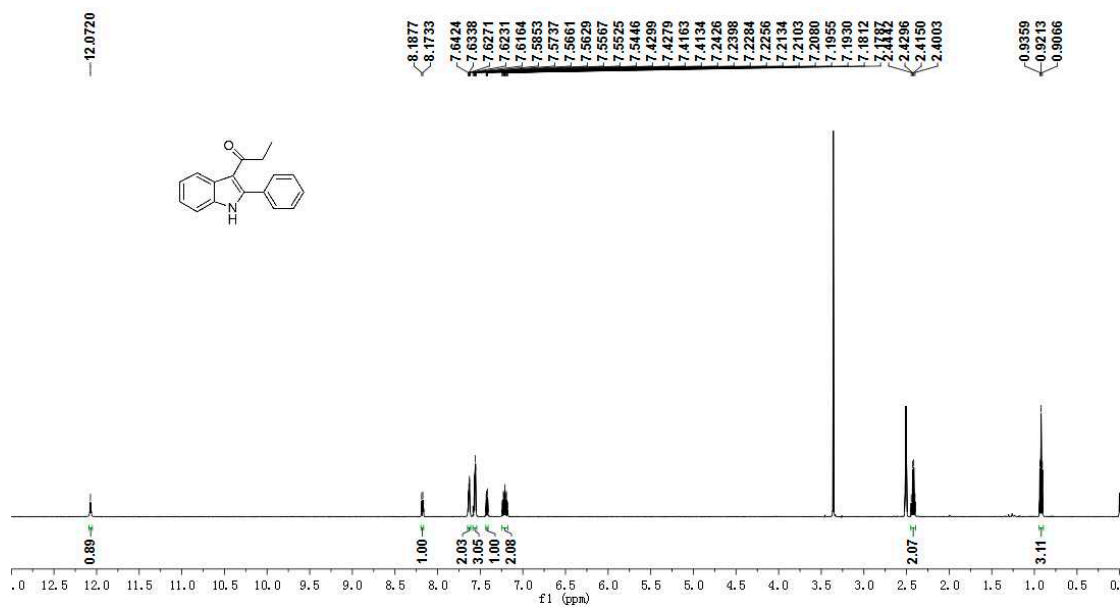

**<sup>13</sup>C NMR spectra (125 MHz, DMSO-*d*<sub>6</sub>) of 3db**

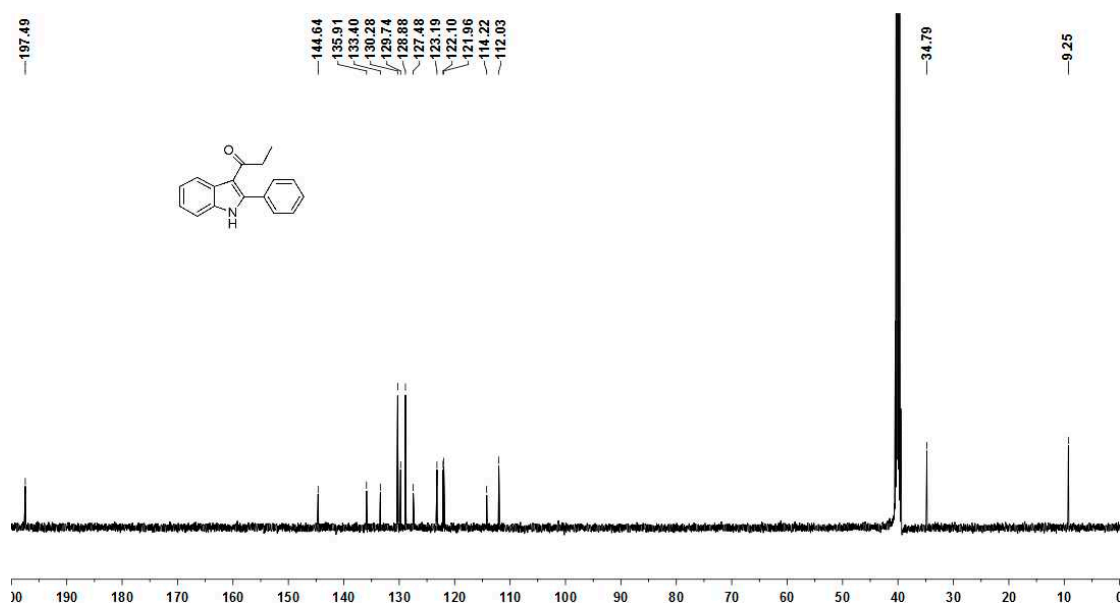

**$^1\text{H}$  NMR spectra (500 MHz,  $\text{DMSO}-d_6$ ) of 3dc**

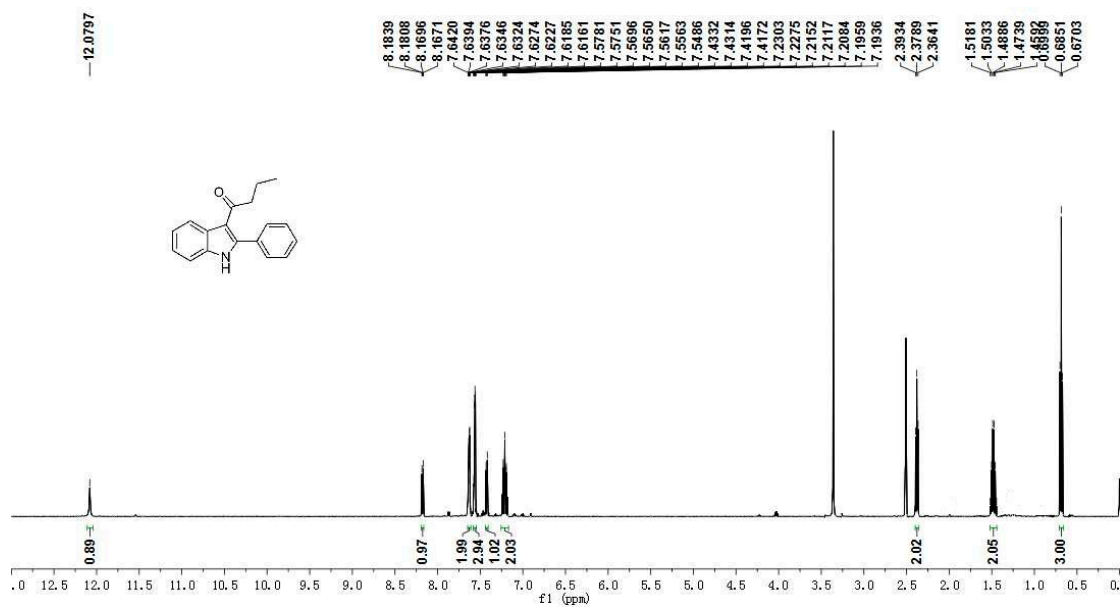

**$^{13}\text{C}$  NMR spectra (125 MHz,  $\text{DMSO}-d_6$ ) of 3dc**

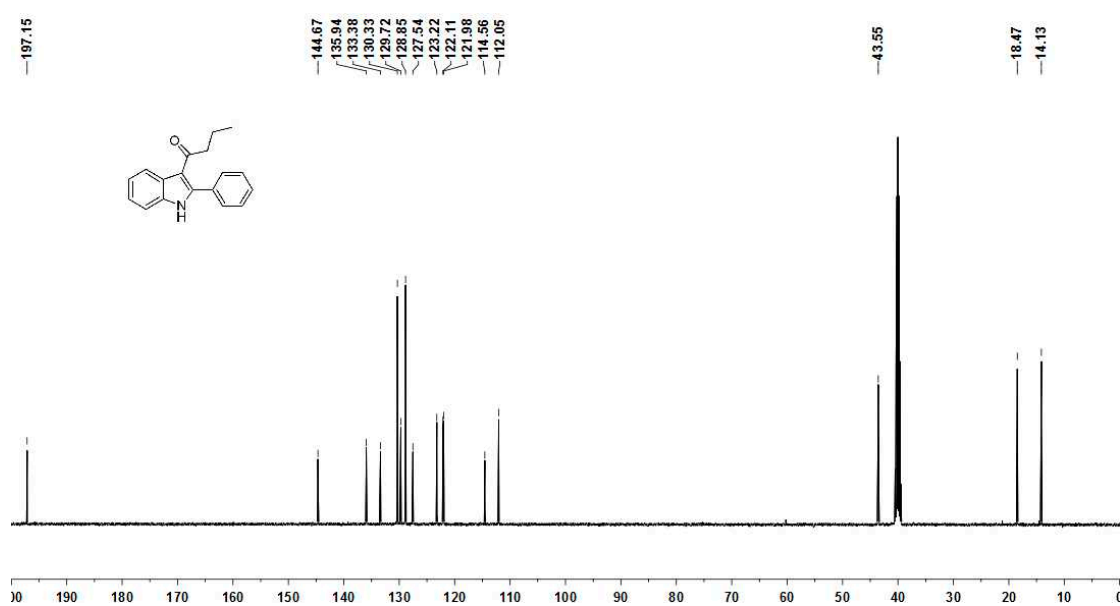



**$^1\text{H}$  NMR spectra (500 MHz,  $\text{DMSO-}d_6$ ) of 3dd**

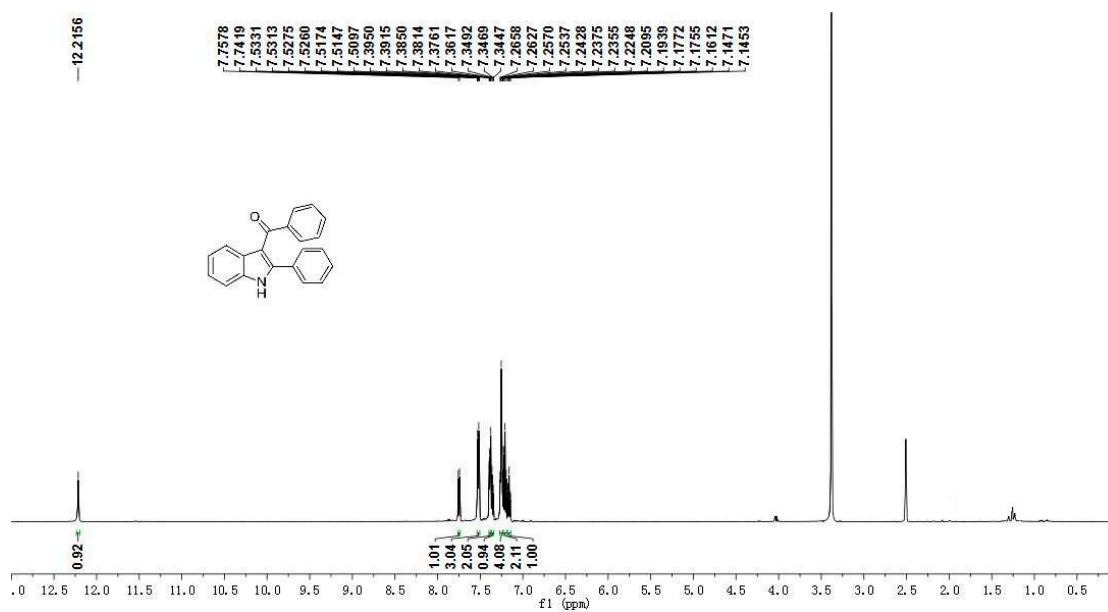

**$^{13}\text{C}$  NMR spectra (125 MHz,  $\text{DMSO-}d_6$ ) of 3dd**

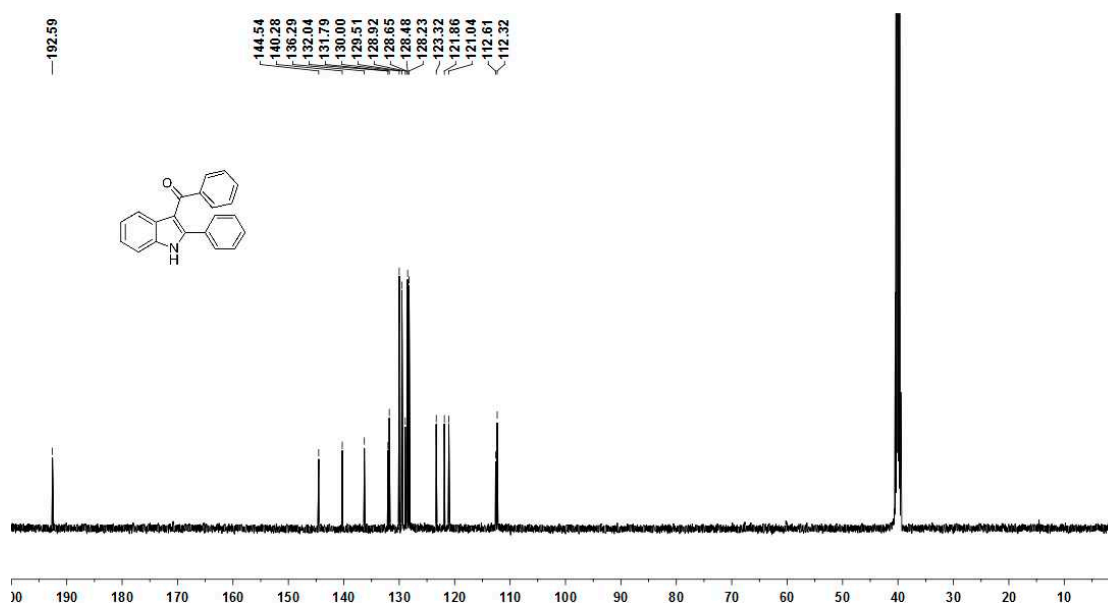

**$^1\text{H}$  NMR spectra (500 MHz,  $\text{DMSO-}d_6$ ) of 3ea**

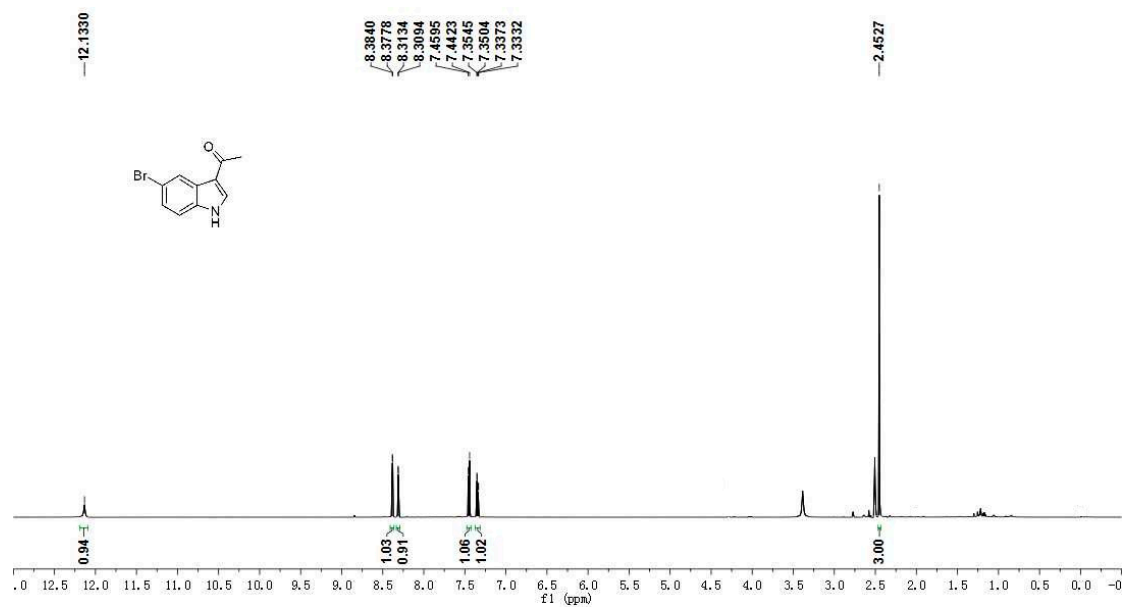

**$^{13}\text{C}$  NMR spectra (125 MHz,  $\text{DMSO-}d_6$ ) of 3ea**

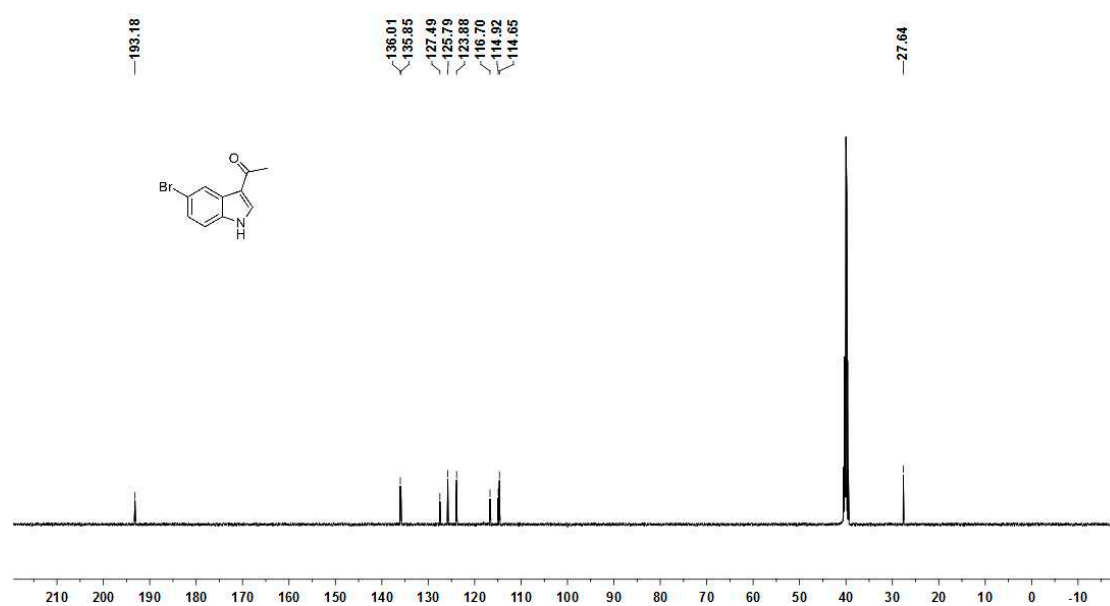

**$^1\text{H}$  NMR spectra (500 MHz,  $\text{DMSO-}d_6$ ) of 3eb**

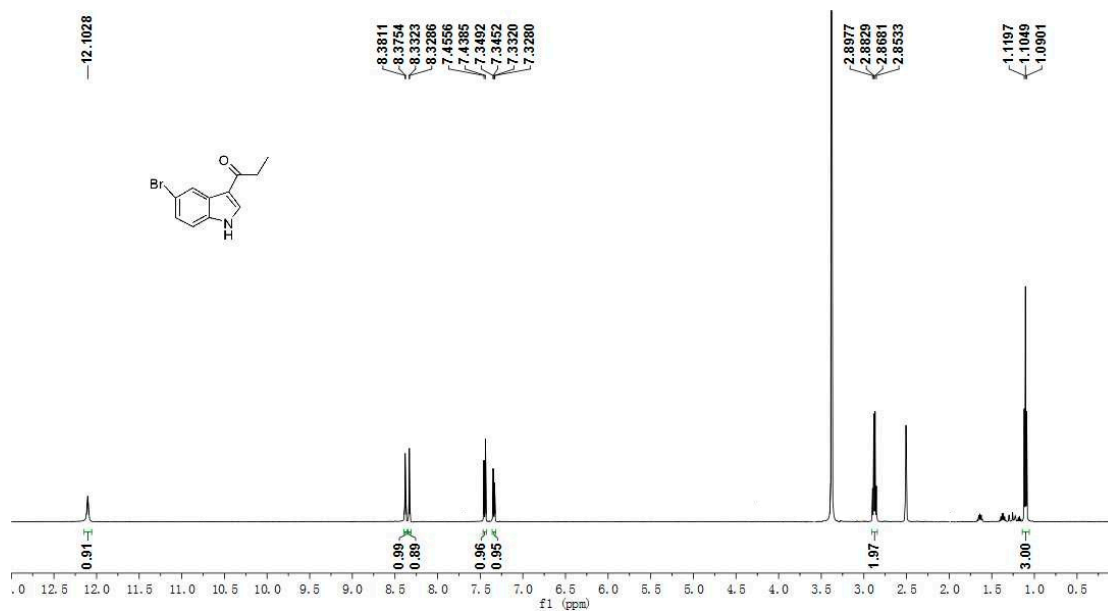

**$^{13}\text{C}$  NMR spectra (125 MHz,  $\text{DMSO-}d_6$ ) of 3eb**

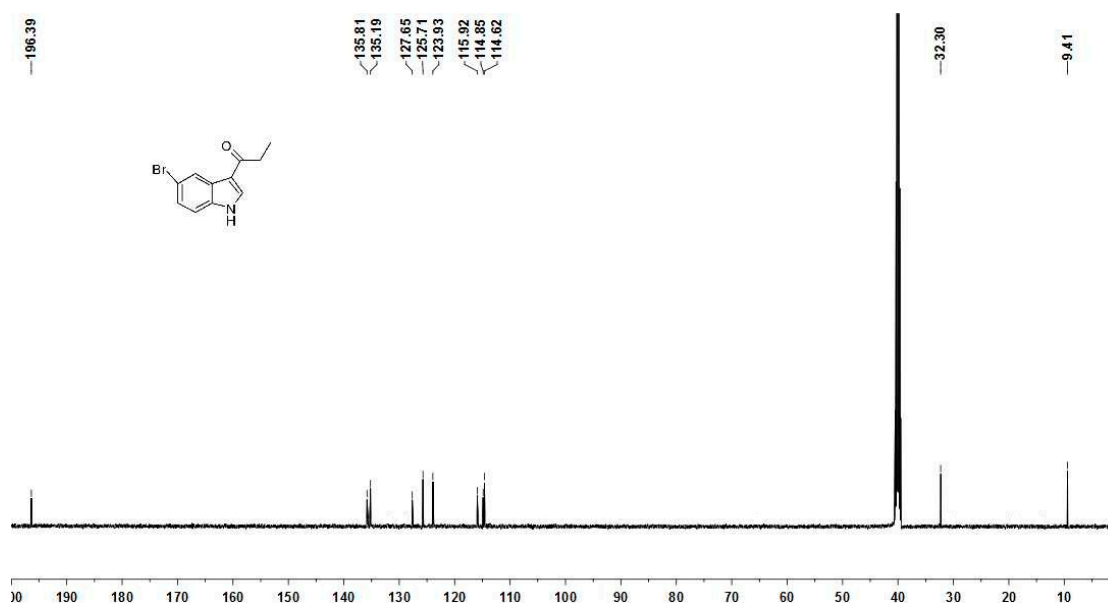

**$^1\text{H}$  NMR spectra (500 MHz,  $\text{DMSO-}d_6$ ) of 3ec**

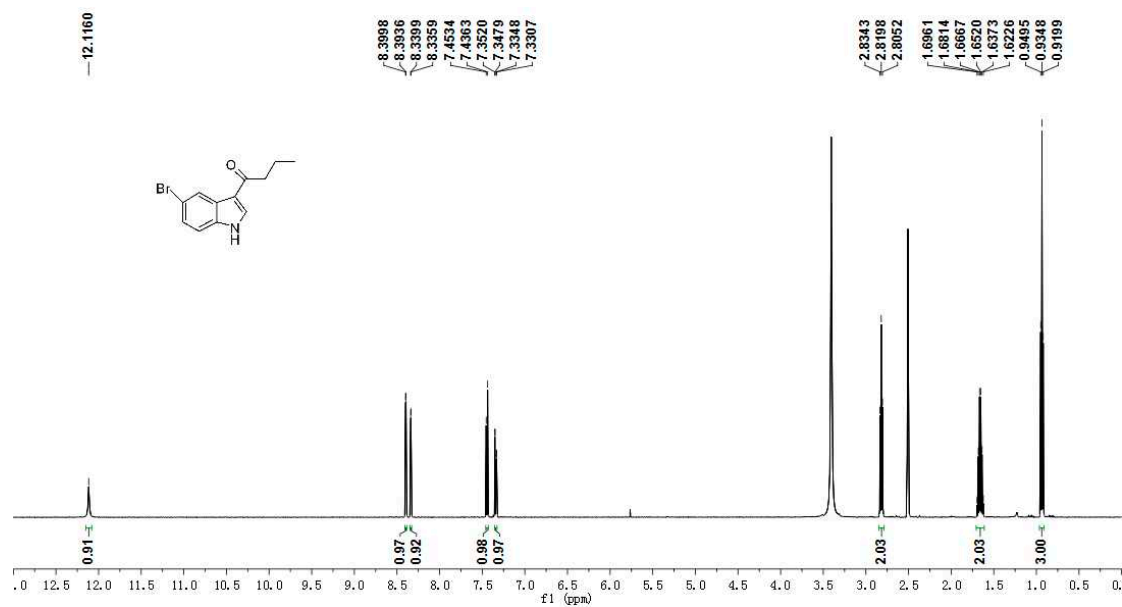

**$^{13}\text{C}$  NMR spectra (125 MHz,  $\text{DMSO-}d_6$ ) of 3ec**

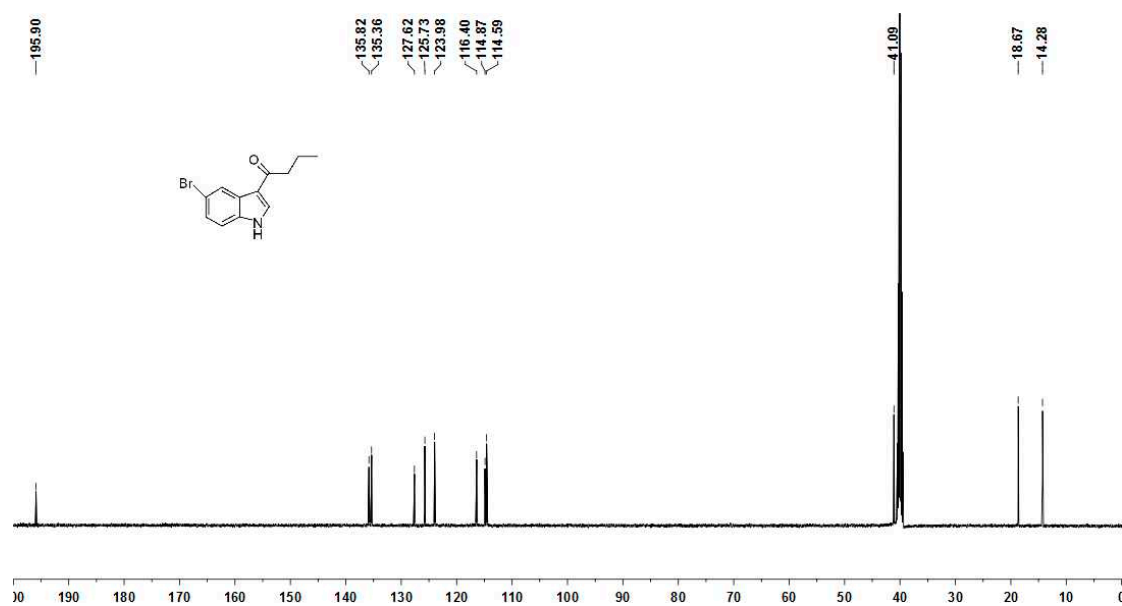

**$^1\text{H}$  NMR spectra (500 MHz,  $\text{DMSO-}d_6$ ) of 3ed**

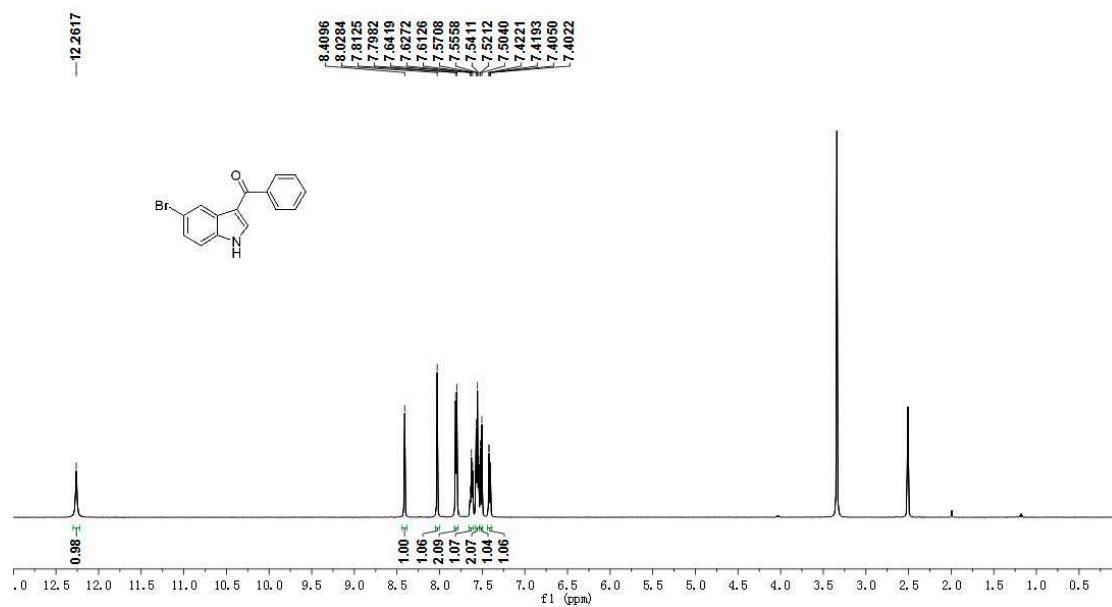

**$^{13}\text{C}$  NMR spectra (125 MHz,  $\text{DMSO-}d_6$ ) of 3ed**

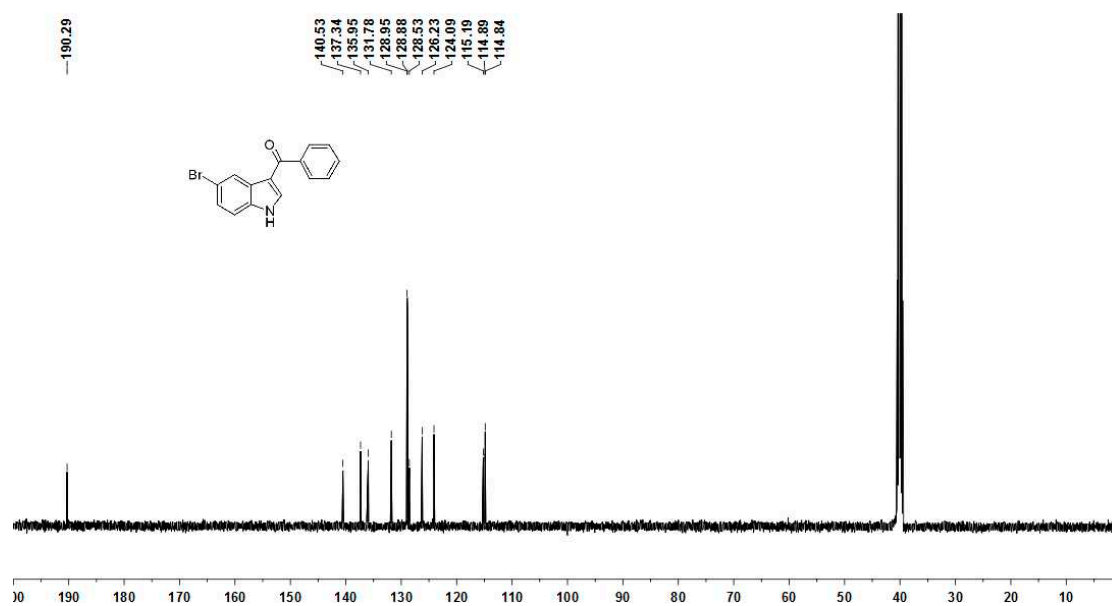

**$^1\text{H}$  NMR spectra (500 MHz,  $\text{DMSO-}d_6$ ) of 3fa**

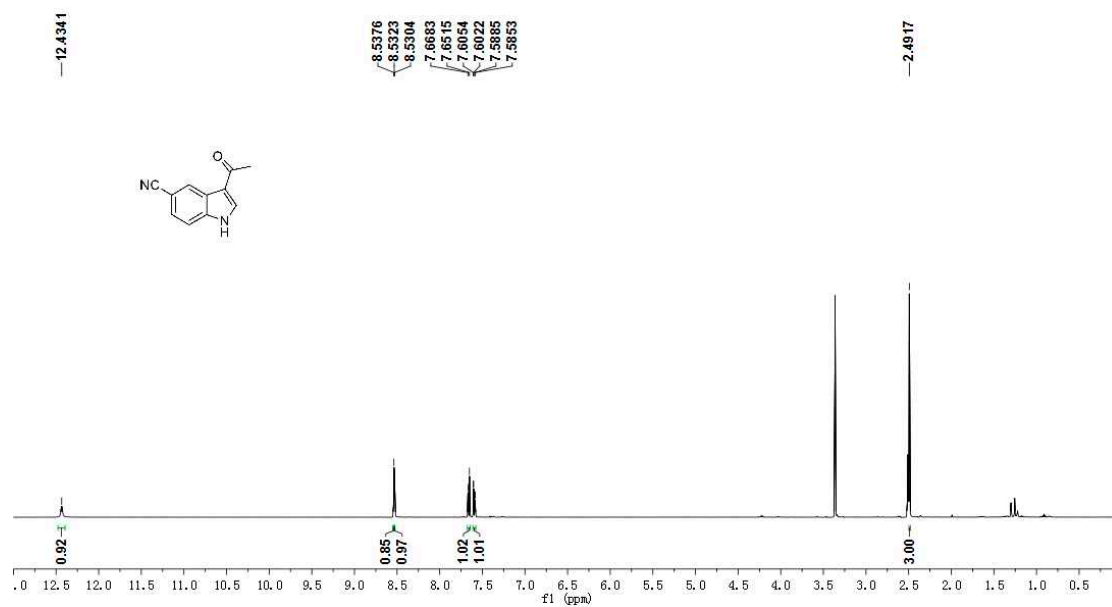

**$^{13}\text{C}$  NMR spectra (125 MHz,  $\text{DMSO-}d_6$ ) of 3fa**

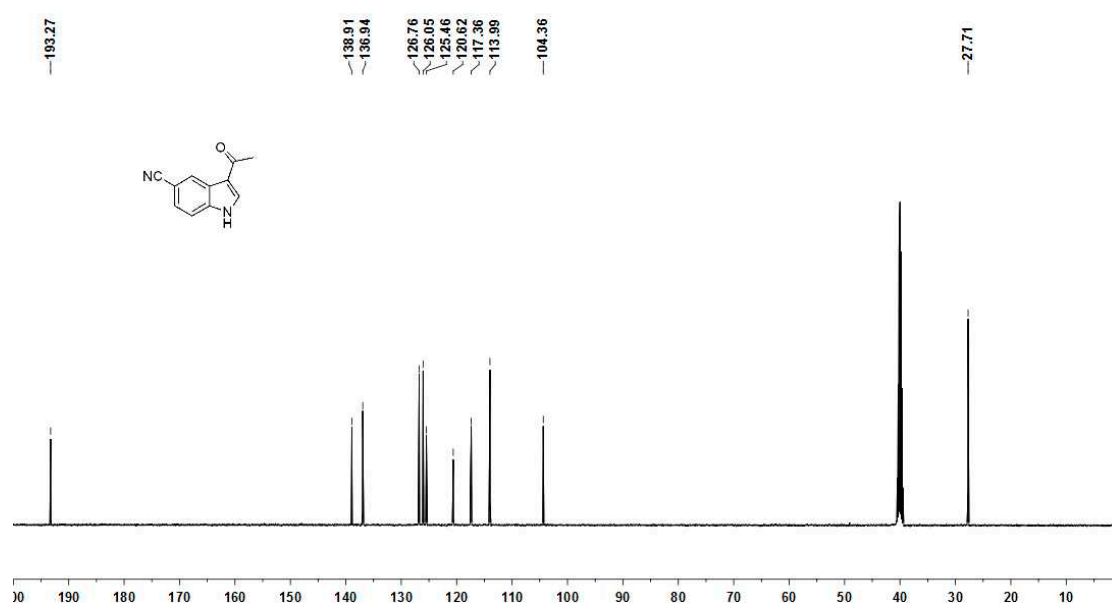

**$^1\text{H}$  NMR spectra (500 MHz,  $\text{DMSO-}d_6$ ) of 3fb**

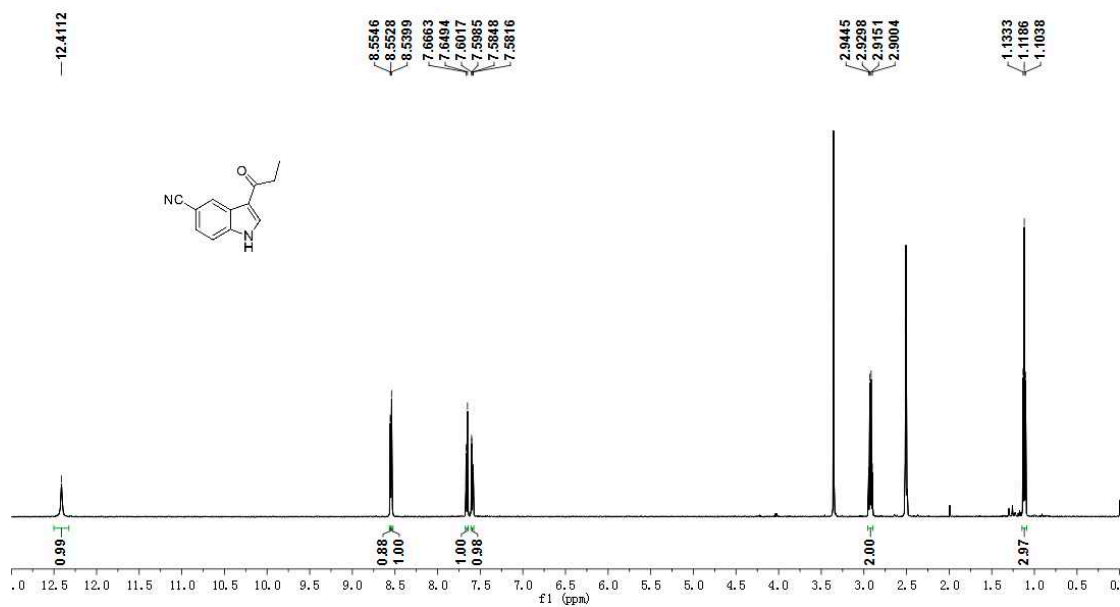

**$^{13}\text{C}$  NMR spectra (125 MHz,  $\text{DMSO-}d_6$ ) of 3fb**

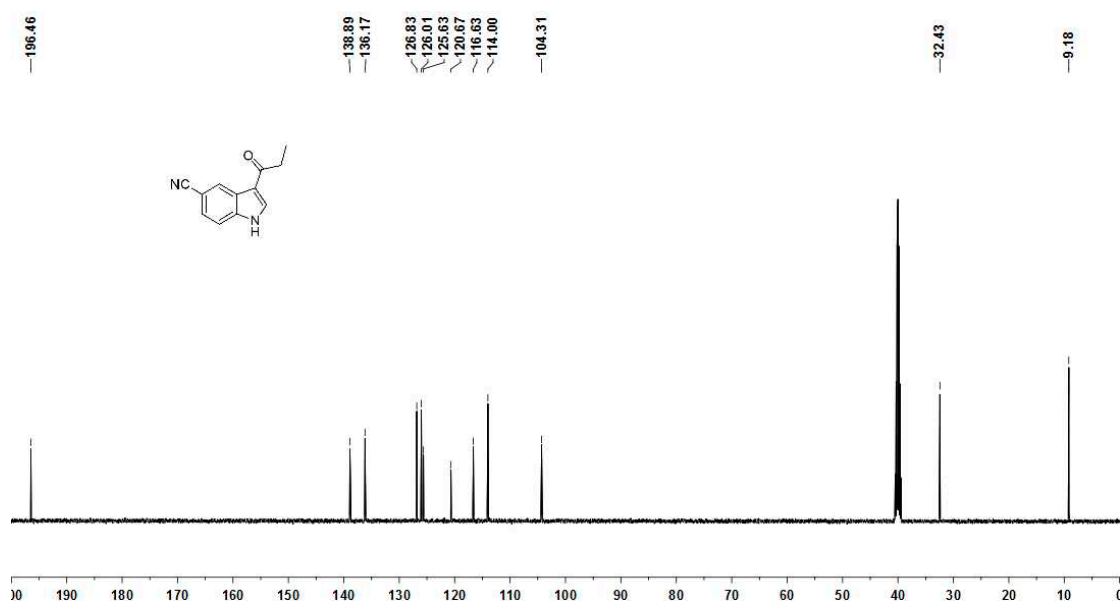

**$^1\text{H}$  NMR spectra (500 MHz,  $\text{DMSO-}d_6$ ) of 3fc**

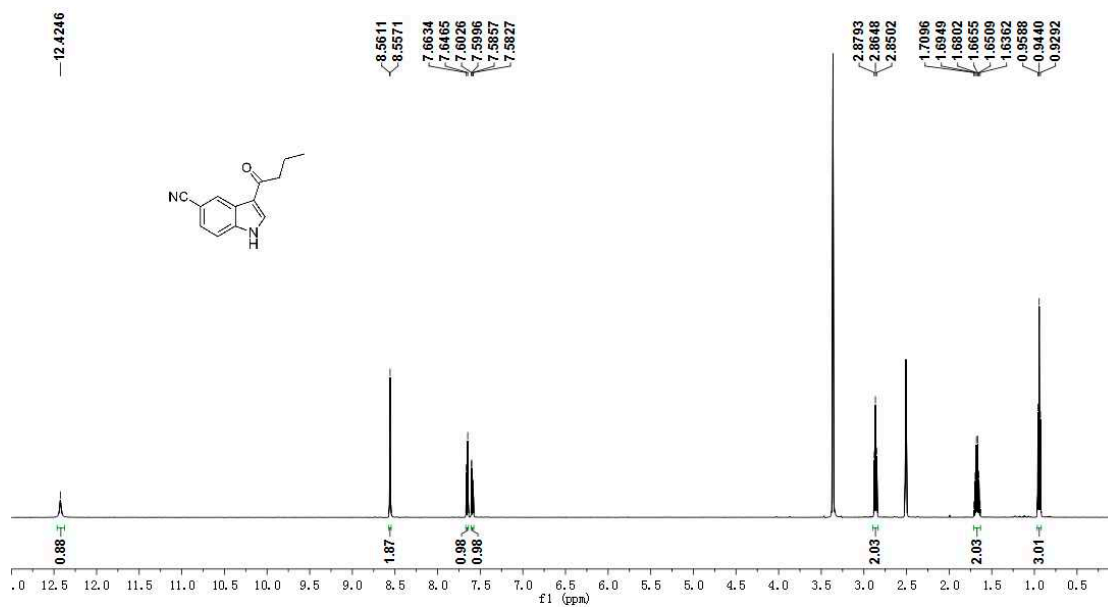

**$^{13}\text{C}$  NMR spectra (125 MHz,  $\text{DMSO-}d_6$ ) of 3fc**

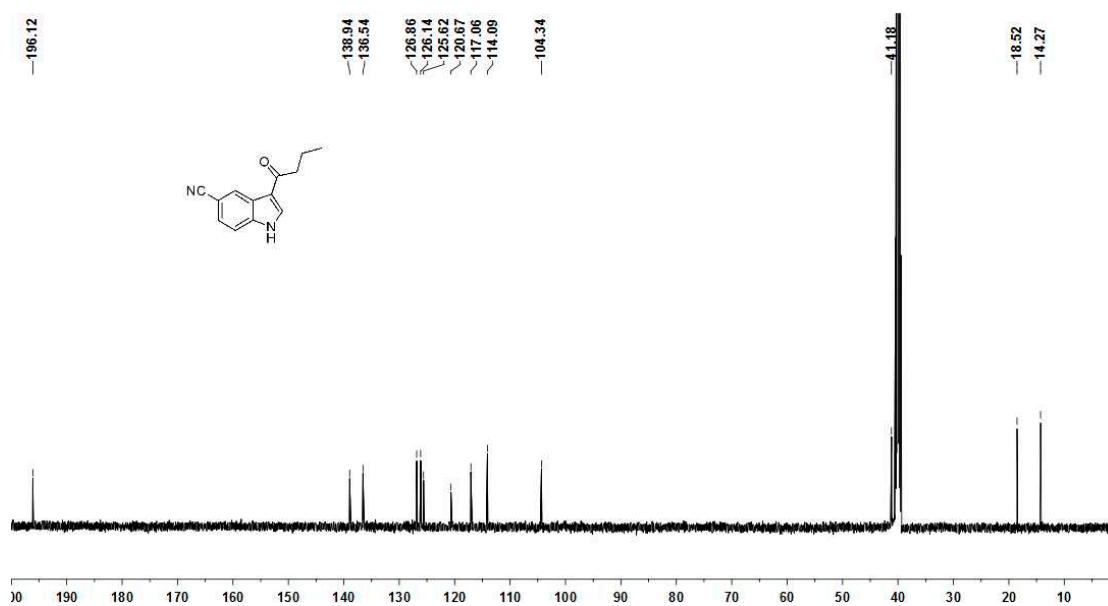



**$^1\text{H}$  NMR spectra (500 MHz,  $\text{DMSO-}d_6$ ) of 3fd**

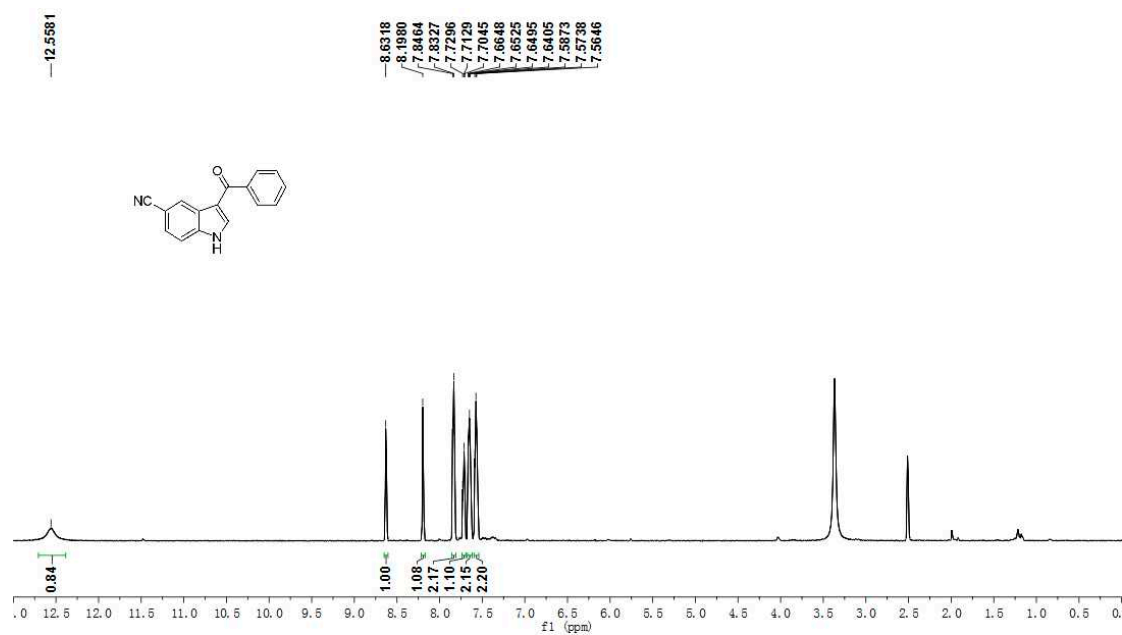

**$^{13}\text{C}$  NMR spectra (125 MHz,  $\text{DMSO-}d_6$ ) of 3fd**

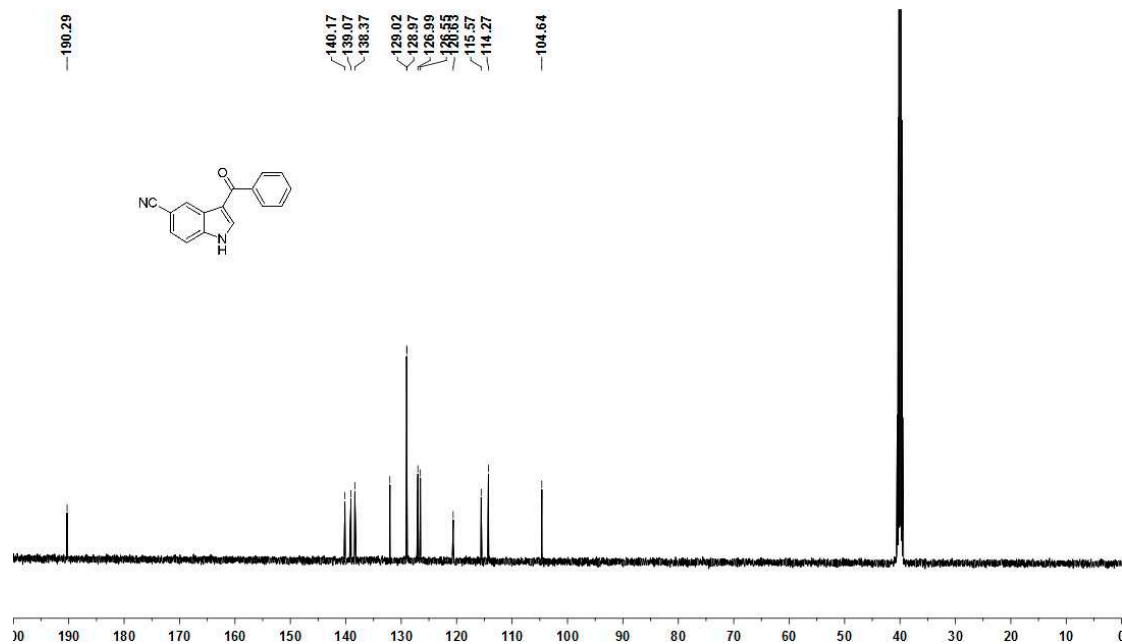

**<sup>1</sup>H NMR spectra (500 MHz, DMSO-*d*<sub>6</sub>) of 3ga**

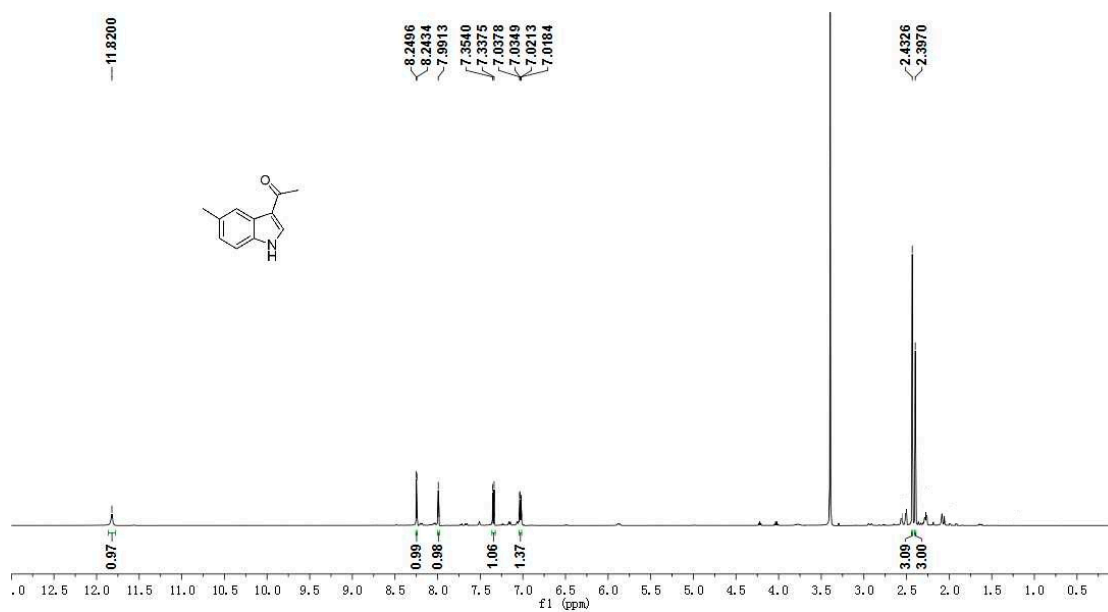

**<sup>13</sup>C NMR spectra (125 MHz, DMSO-*d*<sub>6</sub>) of 3ga**

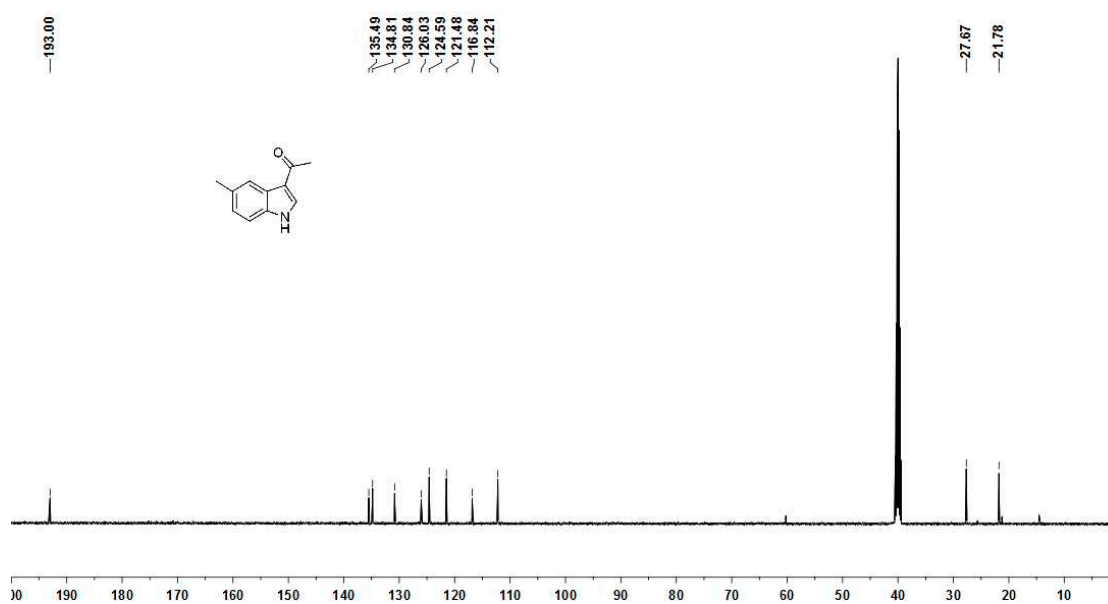

**<sup>1</sup>H NMR spectra (500 MHz, DMSO-*d*<sub>6</sub>) of 3gb**

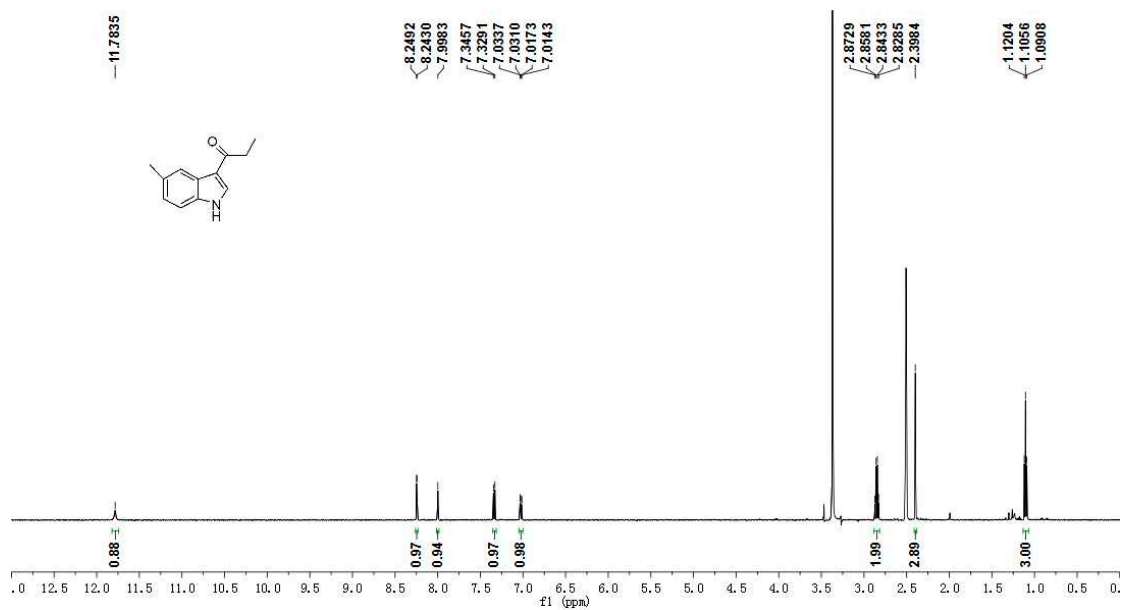

**<sup>13</sup>C NMR spectra (125 MHz, DMSO-*d*<sub>6</sub>) of 3gb**

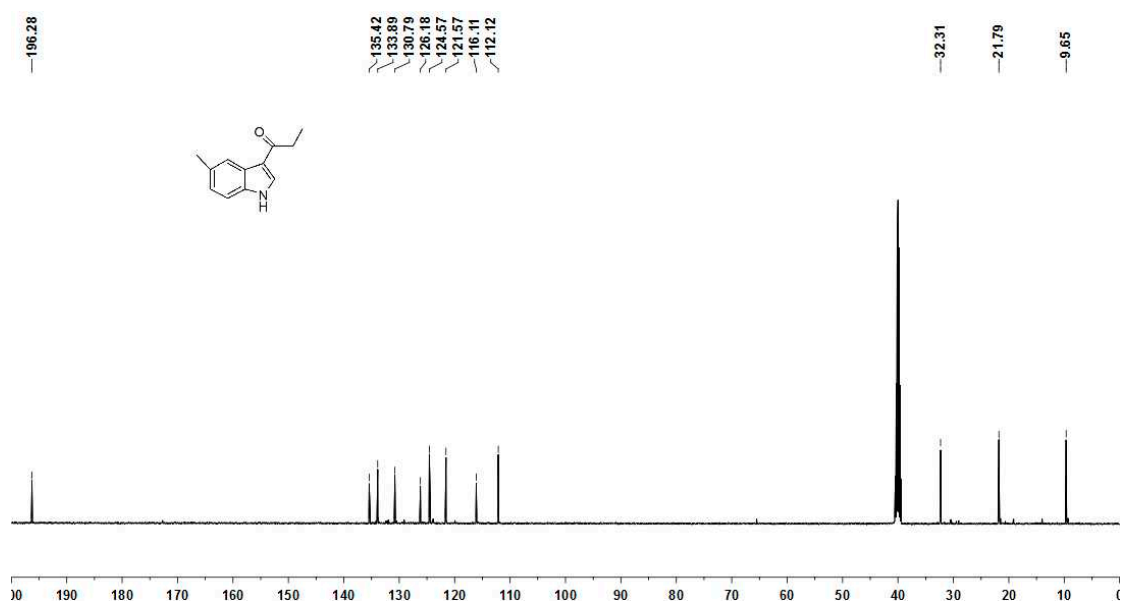

**<sup>1</sup>H NMR spectra (500 MHz, DMSO-*d*<sub>6</sub>) of 3gc**

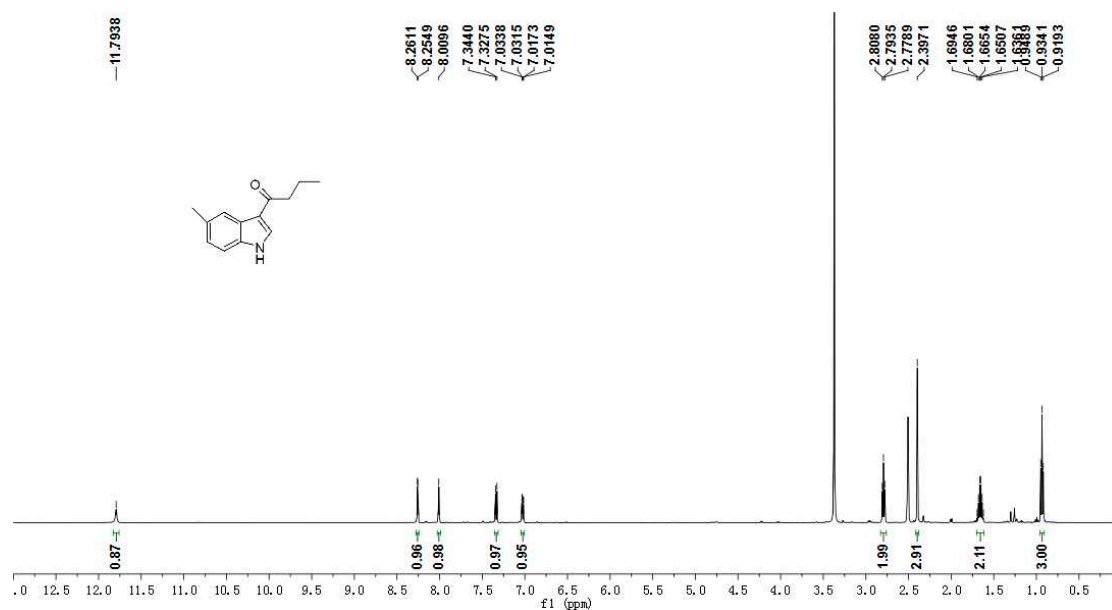

**<sup>13</sup>C NMR spectra (125 MHz, DMSO-*d*<sub>6</sub>) of 3gc**

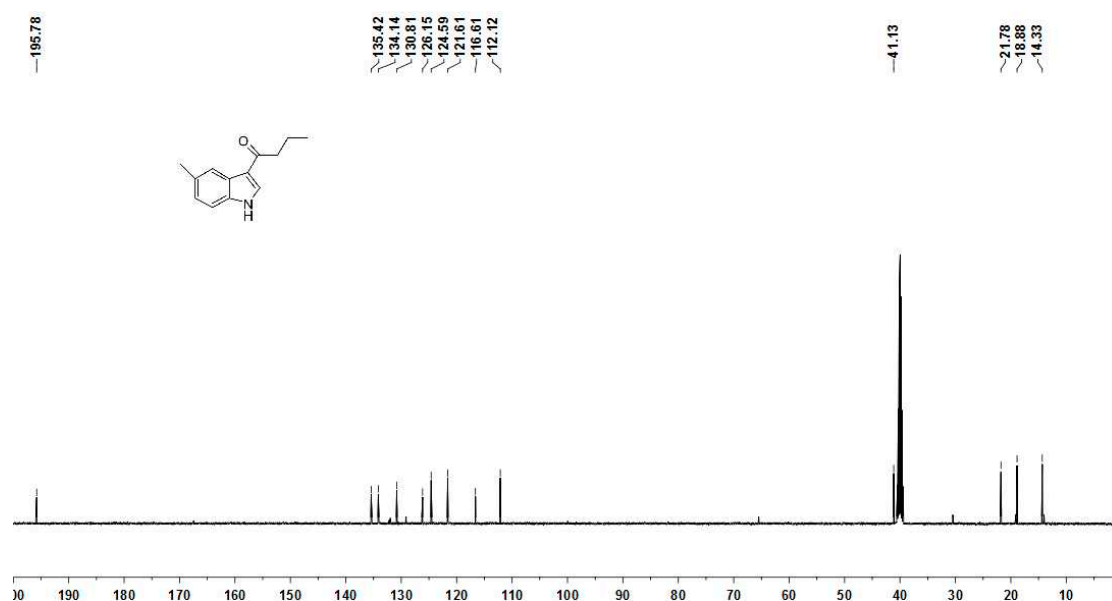

**<sup>1</sup>H NMR spectra (500 MHz, DMSO-*d*<sub>6</sub>) of 3gd**

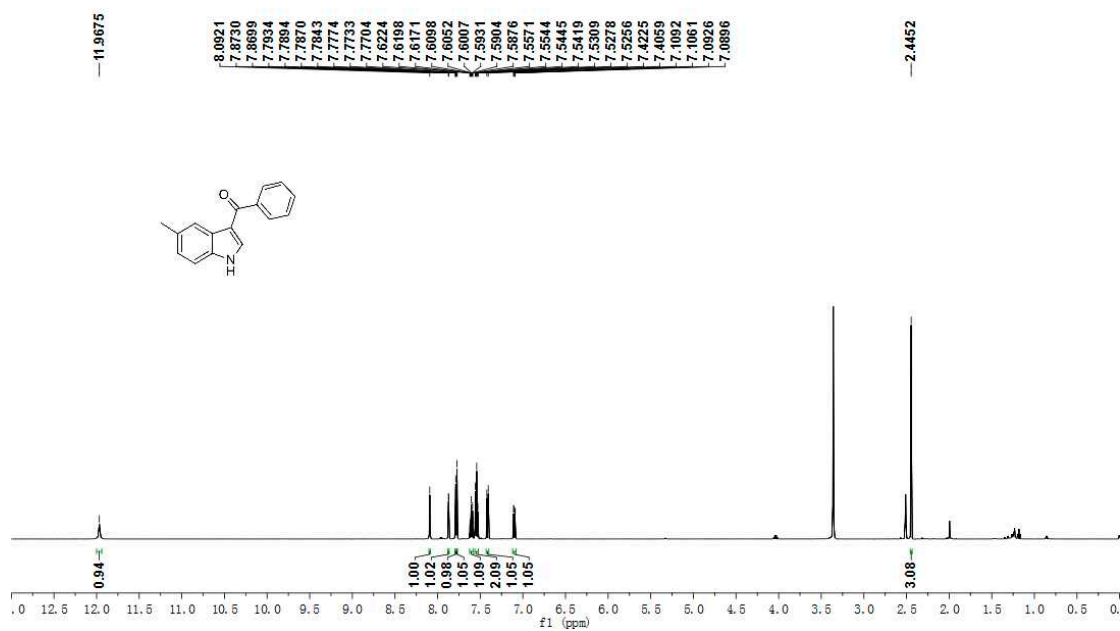

**<sup>13</sup>C NMR spectra (125 MHz, DMSO-*d*<sub>6</sub>) of 3gd**

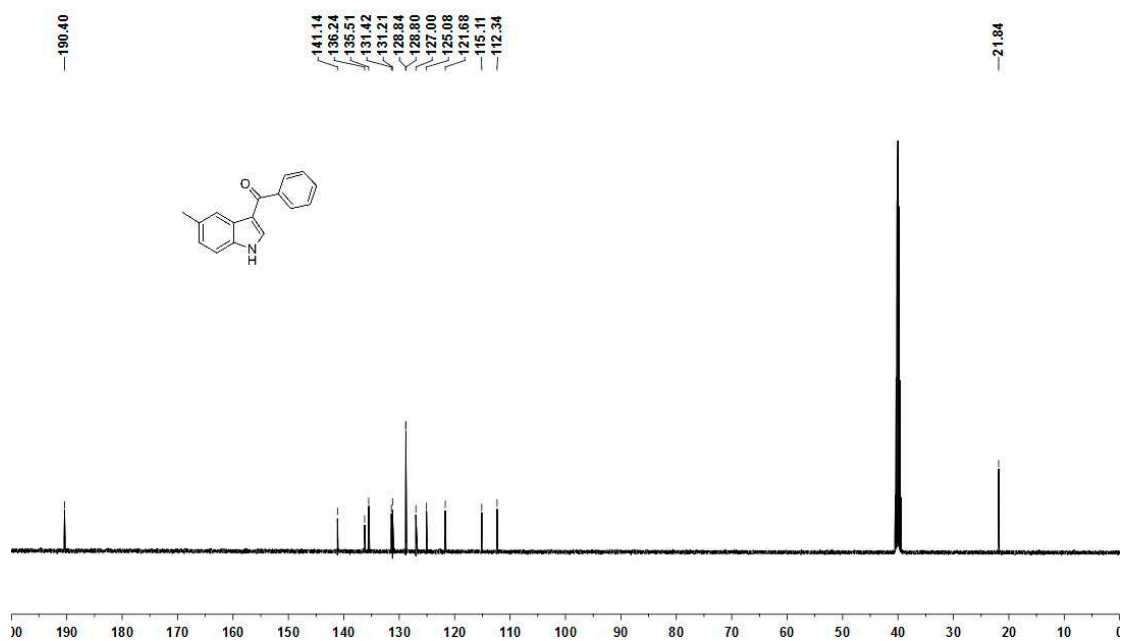

**<sup>1</sup>H NMR spectra (500 MHz, DMSO-*d*<sub>6</sub>) of 3ha**

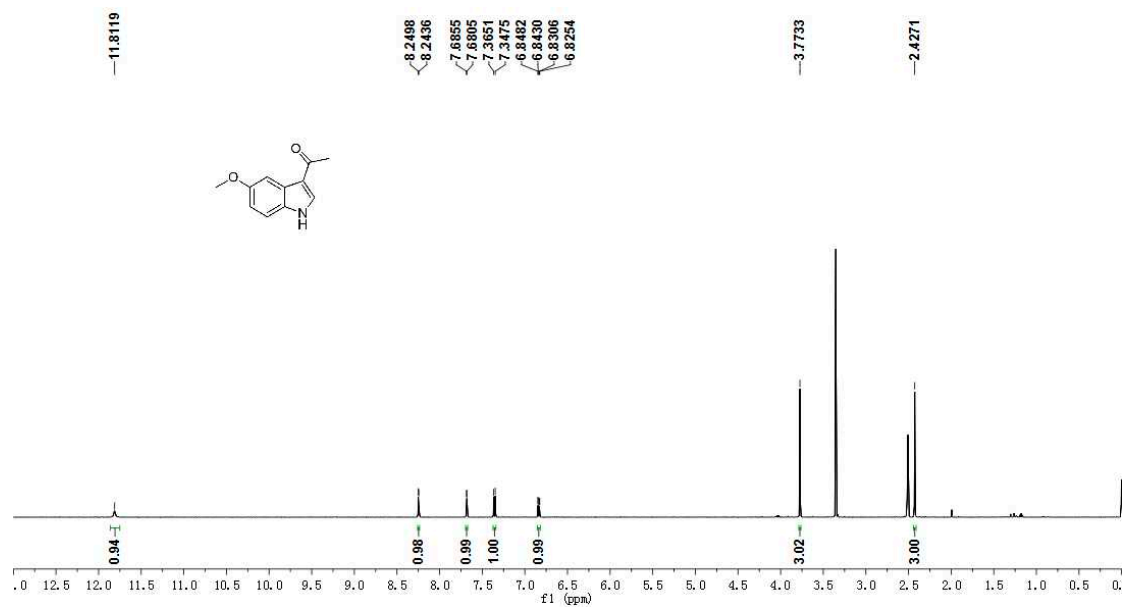

**<sup>13</sup>C NMR spectra (125 MHz, DMSO-*d*<sub>6</sub>) of 3ha**

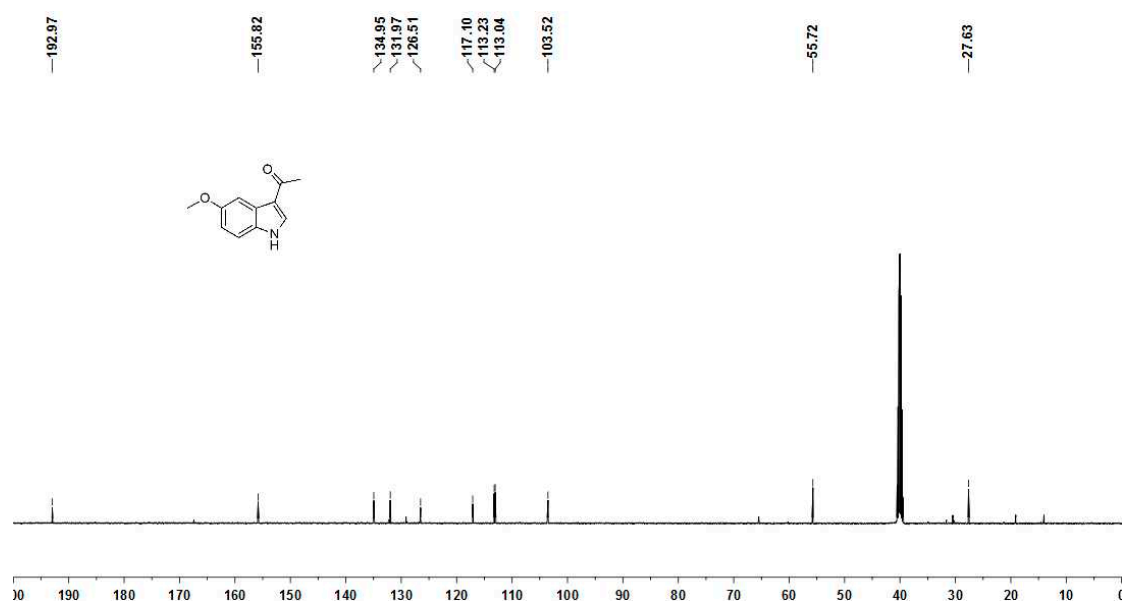

**$^1\text{H}$  NMR spectra (500 MHz,  $\text{DMSO}-d_6$ ) of 3hb**

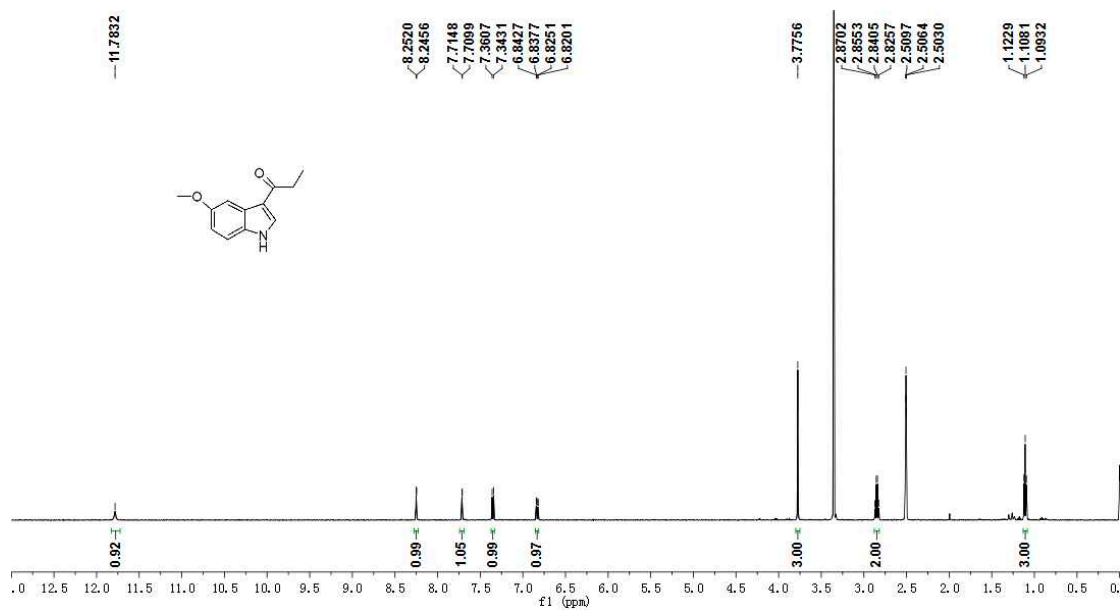

**$^{13}\text{C}$  NMR spectra (125 MHz,  $\text{DMSO}-d_6$ ) of 3hb**

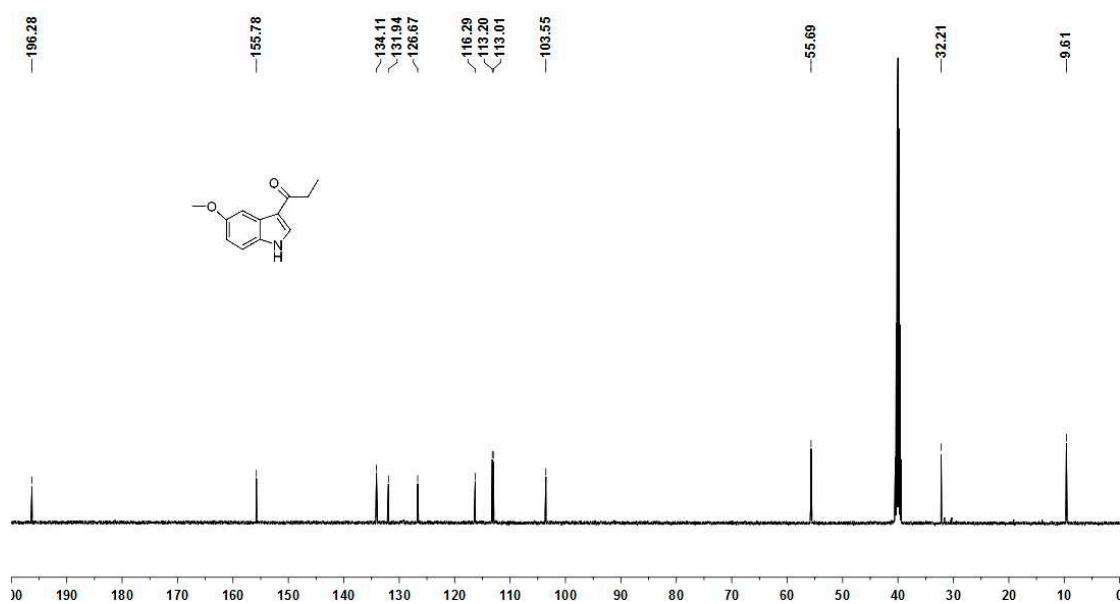

**<sup>1</sup>H NMR spectra (500 MHz, DMSO-*d*<sub>6</sub>) of 3hc**

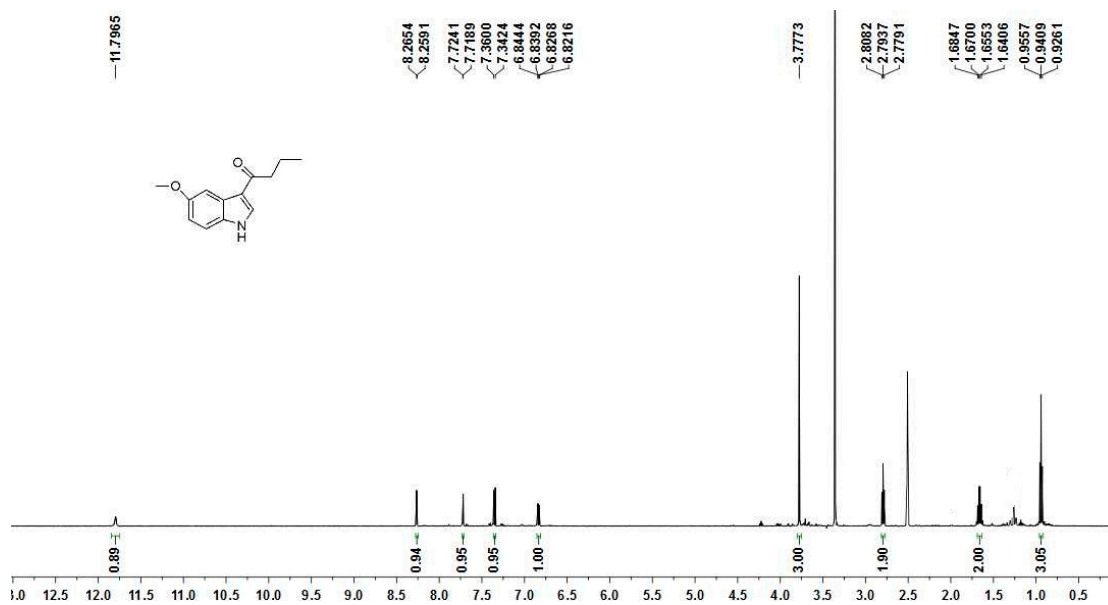

**<sup>13</sup>C NMR spectra (125 MHz, DMSO-*d*<sub>6</sub>) of 3hc**

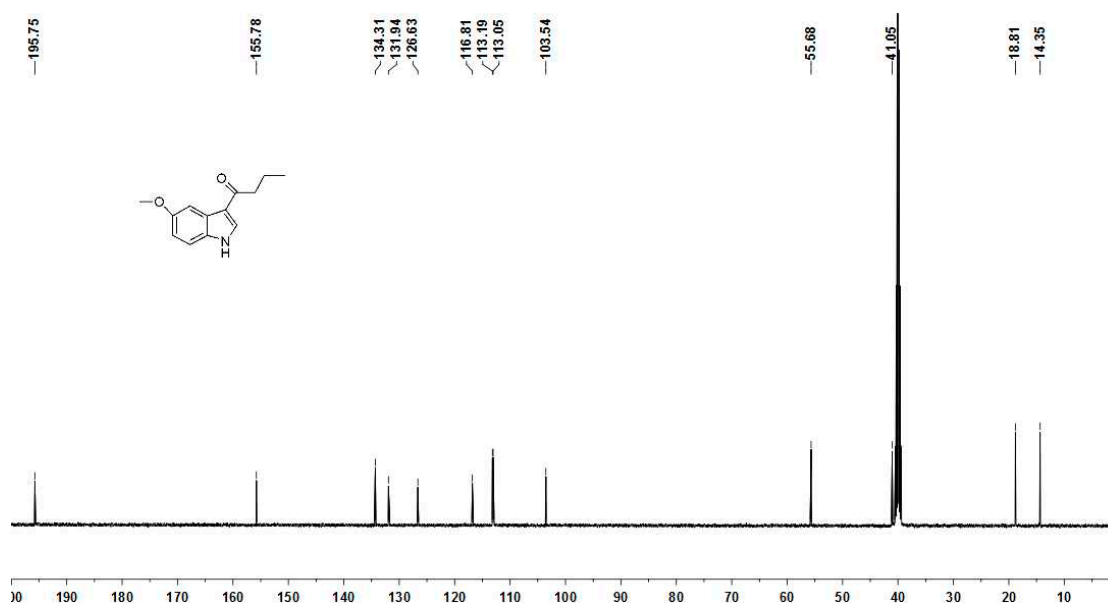



**<sup>1</sup>H NMR spectra (500 MHz, DMSO-*d*<sub>6</sub>) of 3hd**

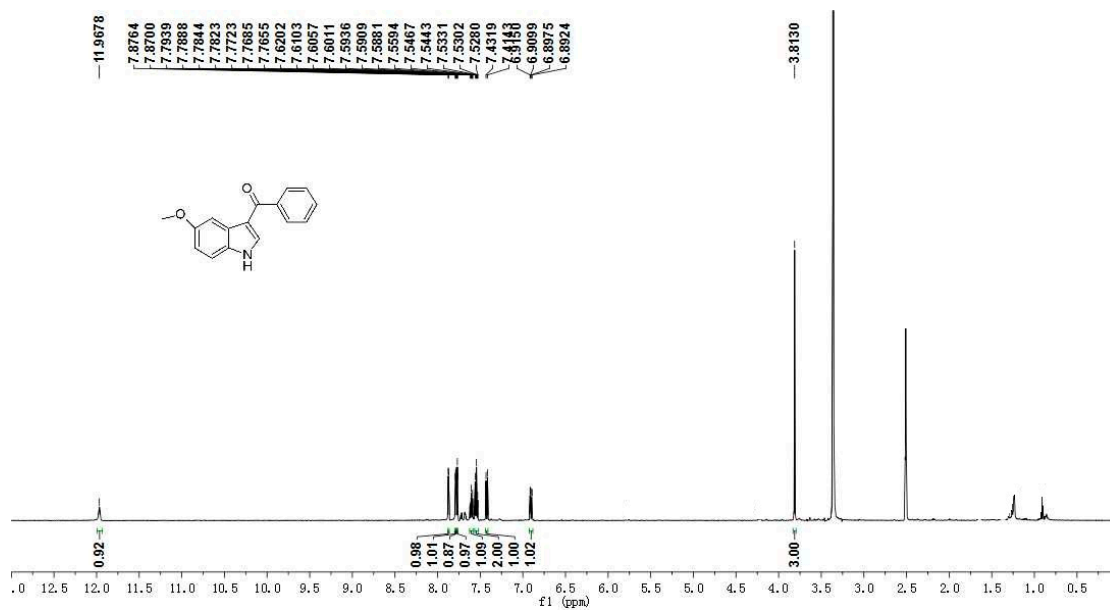

**<sup>13</sup>C NMR spectra (125 MHz, DMSO-*d*<sub>6</sub>) of 3hd**

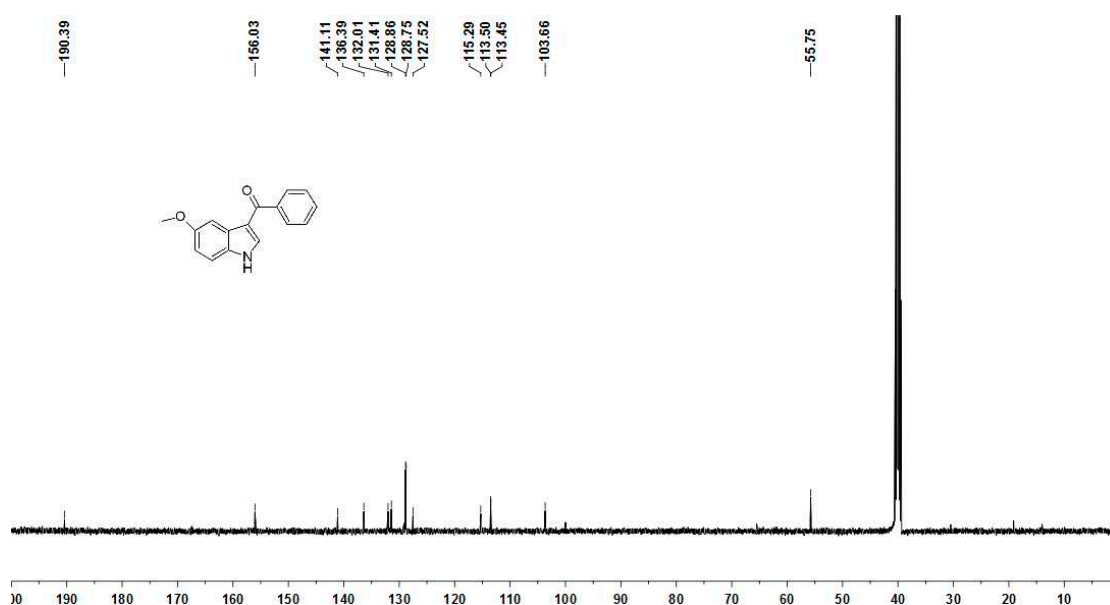

**<sup>1</sup>H NMR spectra (500 MHz, DMSO-*d*<sub>6</sub>) of 3ia**

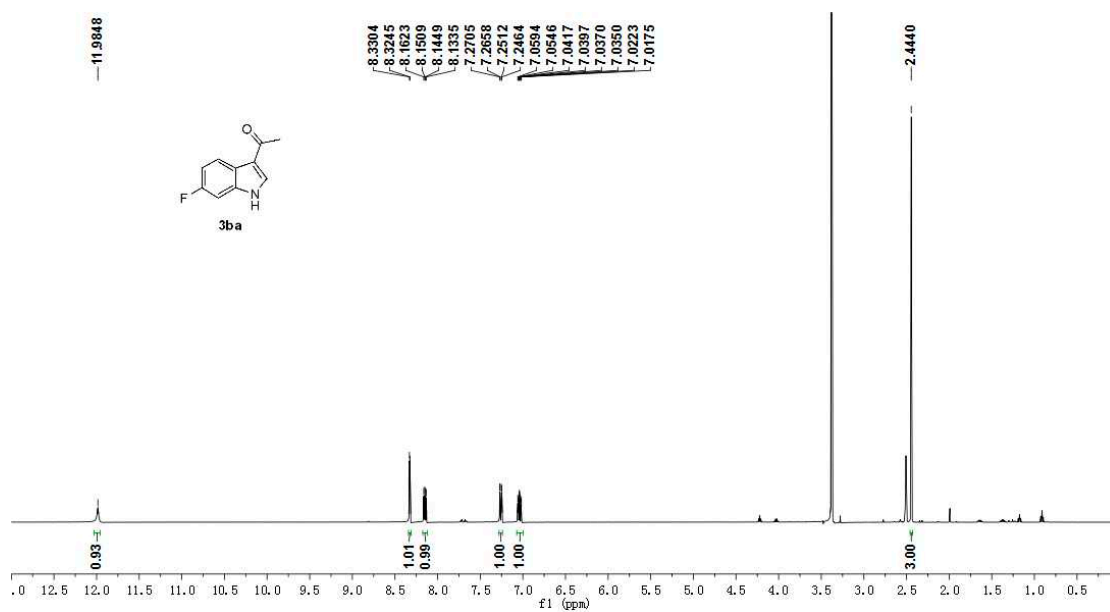

**<sup>13</sup>C NMR spectra (125 MHz, DMSO-*d*<sub>6</sub>) of 3ia**

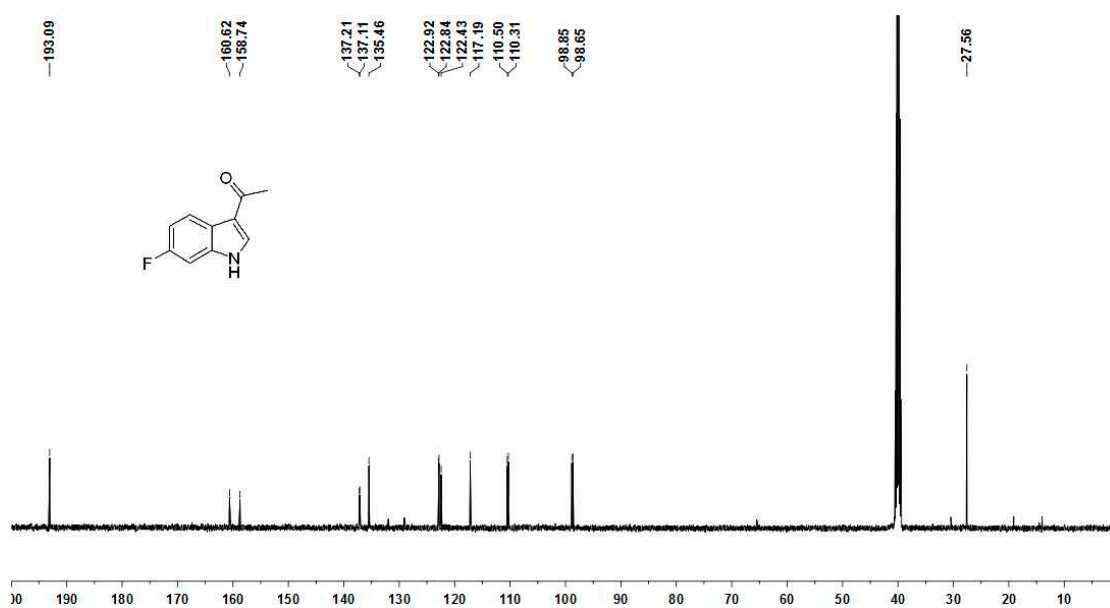

**<sup>1</sup>H NMR spectra (500 MHz, DMSO-*d*<sub>6</sub>) of 3ib**

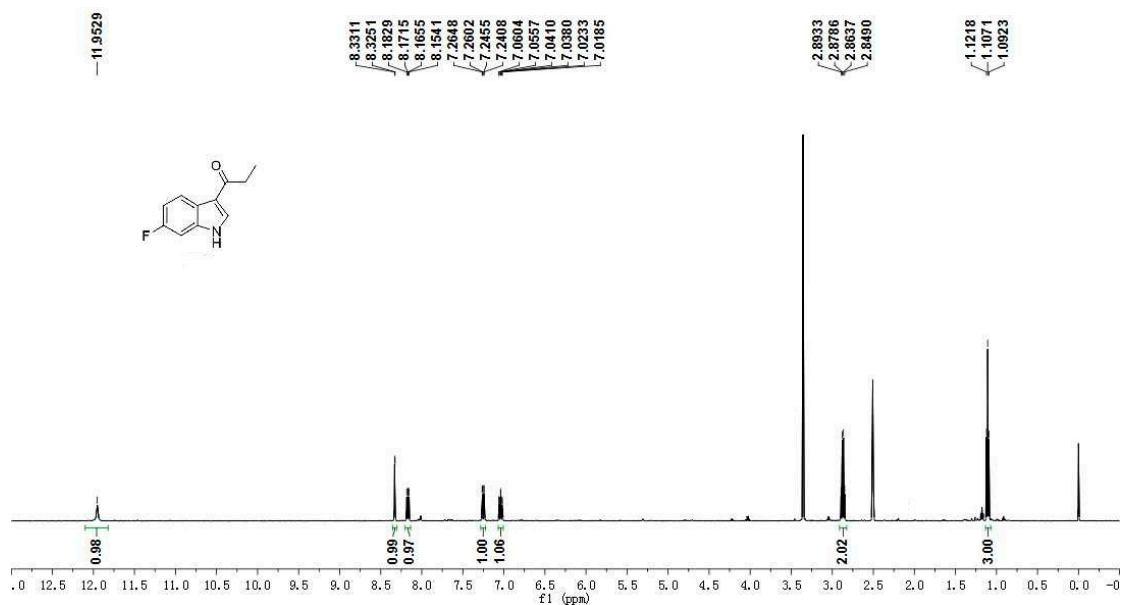

**<sup>13</sup>C NMR spectra (125 MHz, DMSO-*d*<sub>6</sub>) of 3ib**

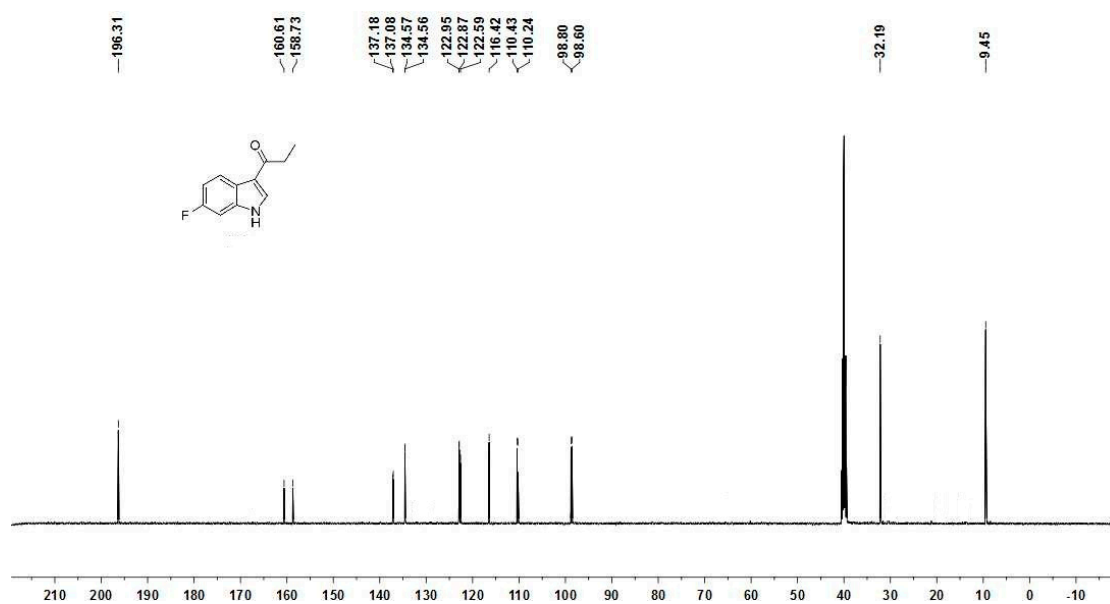

**$^1\text{H}$  NMR spectra (500 MHz,  $\text{DMSO-}d_6$ ) of 3ic**

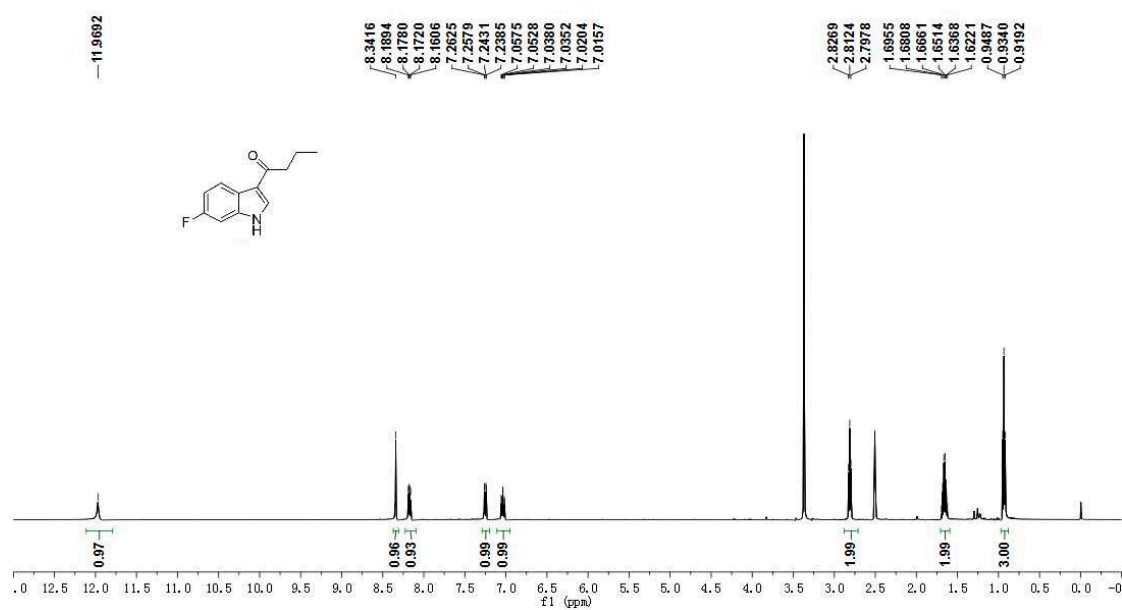

**$^{13}\text{C}$  NMR spectra (125 MHz,  $\text{DMSO-}d_6$ ) of 3ic**

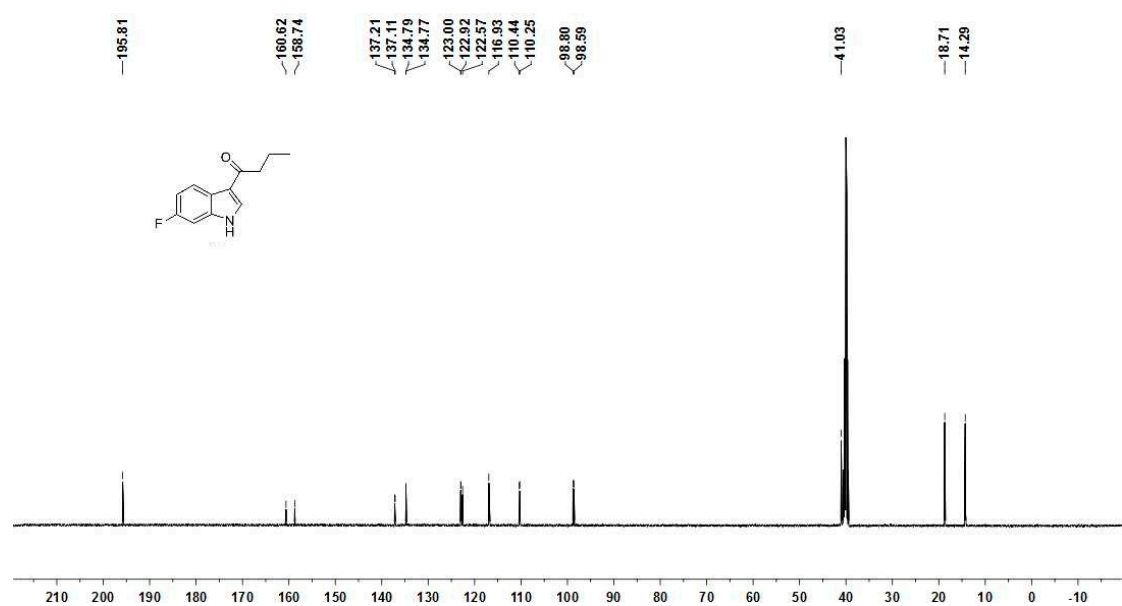

**<sup>1</sup>H NMR spectra (500 MHz, DMSO-*d*<sub>6</sub>) of 3id**

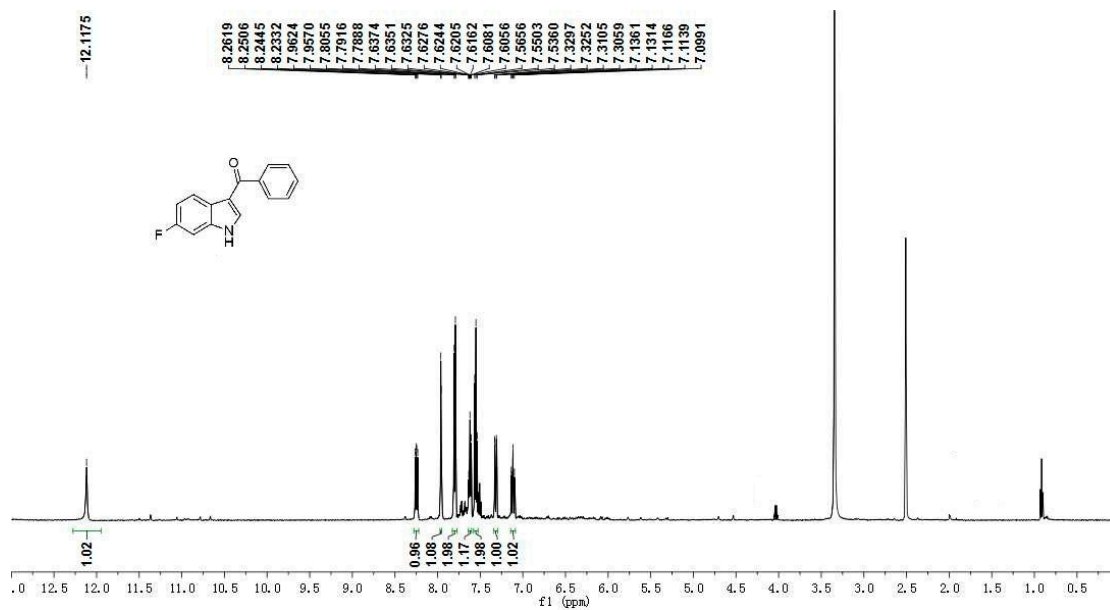

**<sup>13</sup>C NMR spectra (125 MHz, DMSO-*d*<sub>6</sub>) of 3id**

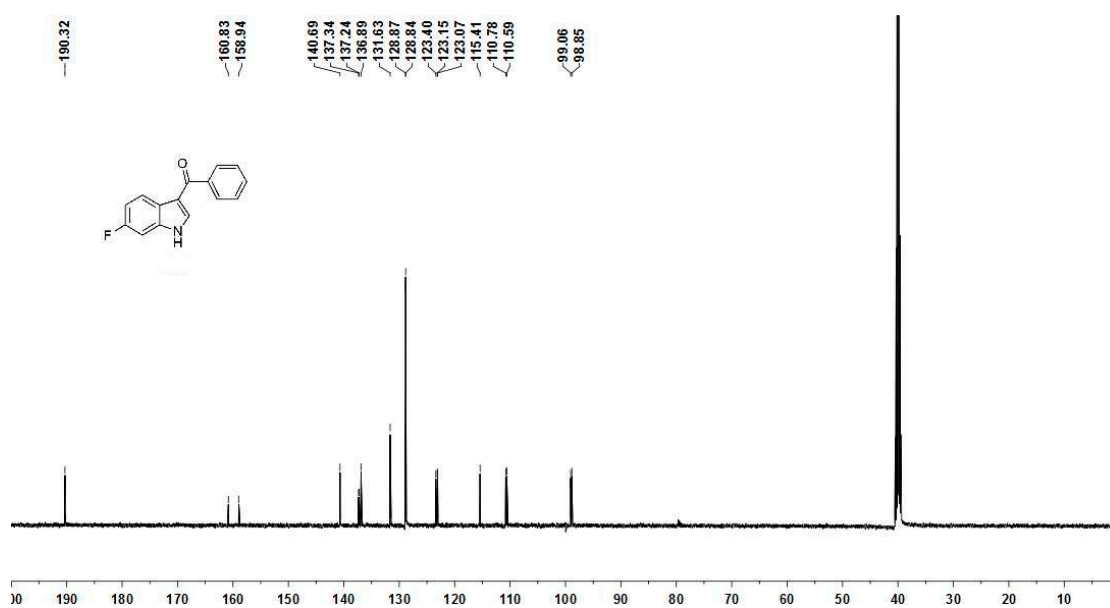

**$^1\text{H}$  NMR spectra (500 MHz,  $\text{DMSO-}d_6$ ) of 3ja**

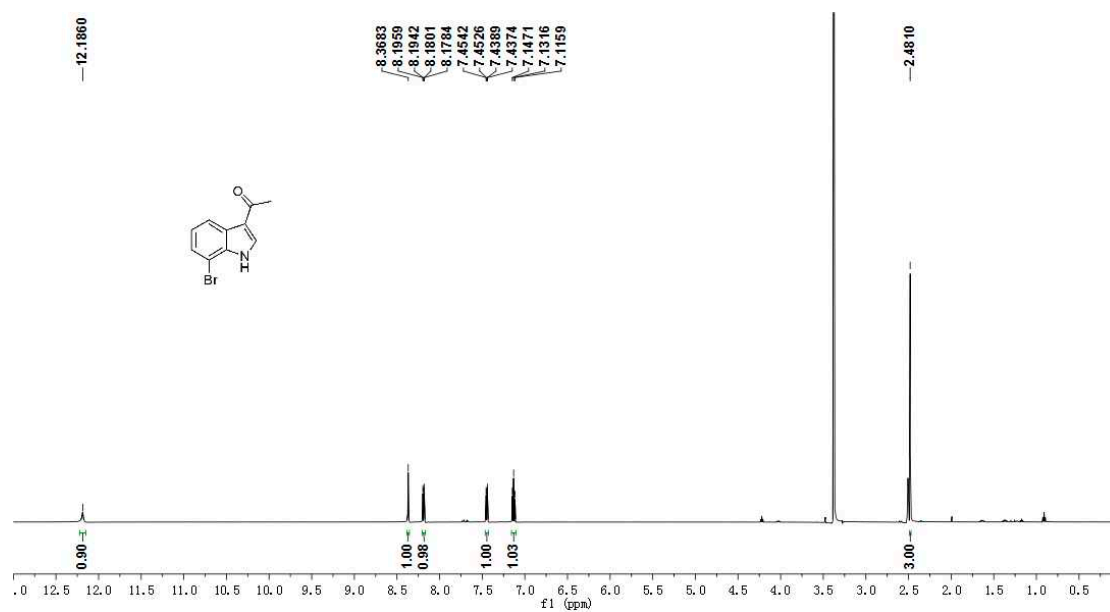

**$^{13}\text{C}$  NMR spectra (125 MHz,  $\text{DMSO-}d_6$ ) of 3ja**

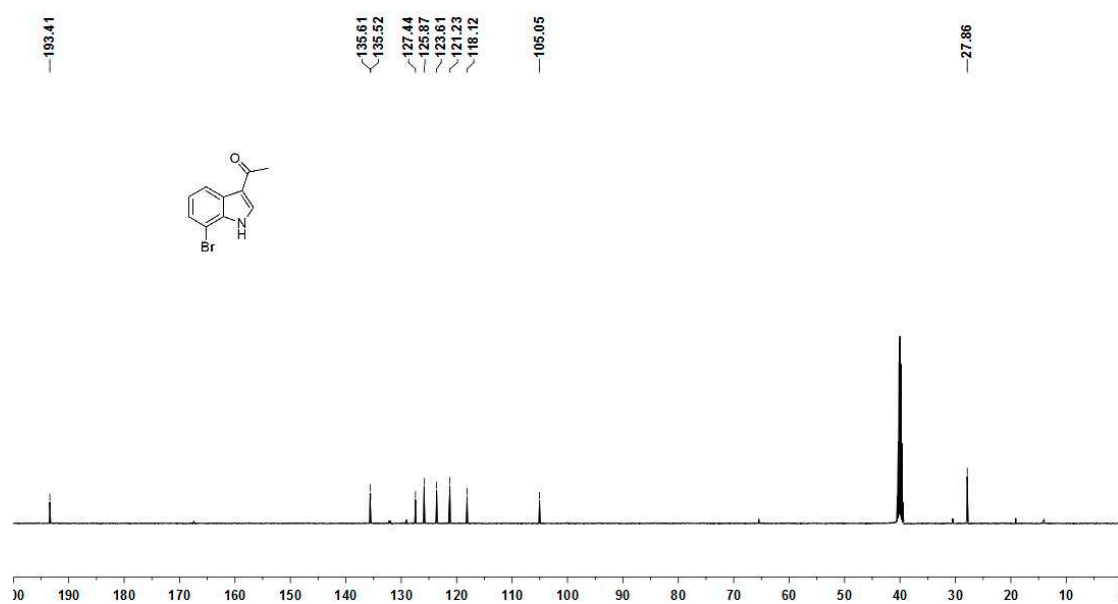

**$^1\text{H}$  NMR spectra (500 MHz,  $\text{DMSO-}d_6$ ) of 3jb**

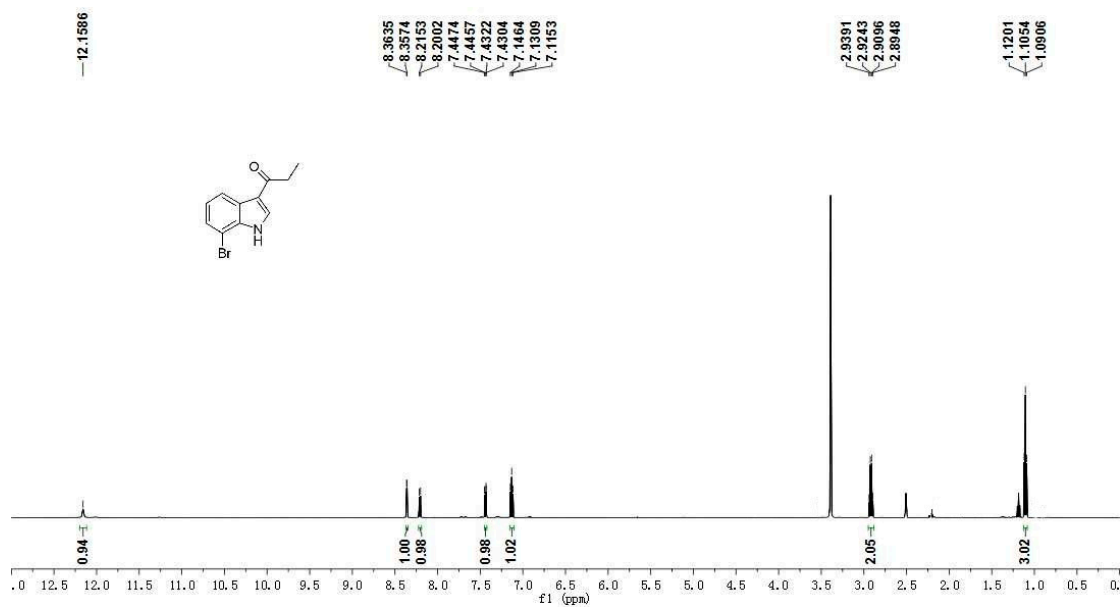

**$^{13}\text{C}$  NMR spectra (125 MHz,  $\text{DMSO-}d_6$ ) of 3jb**

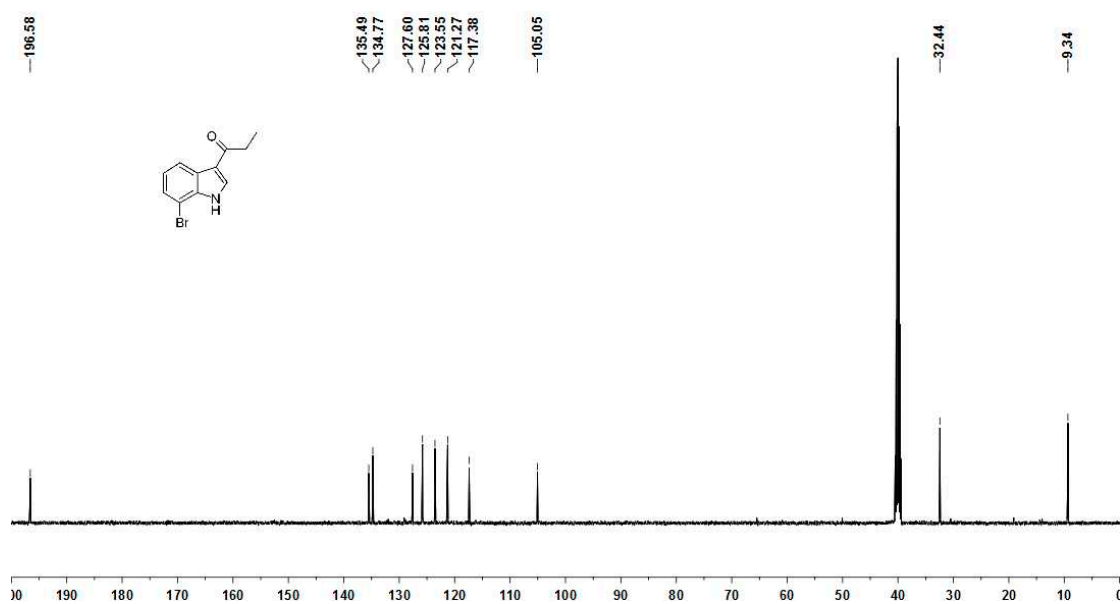

<sup>1</sup>H NMR spectra (500 MHz, DMSO-*d*<sub>6</sub>) of 3jc

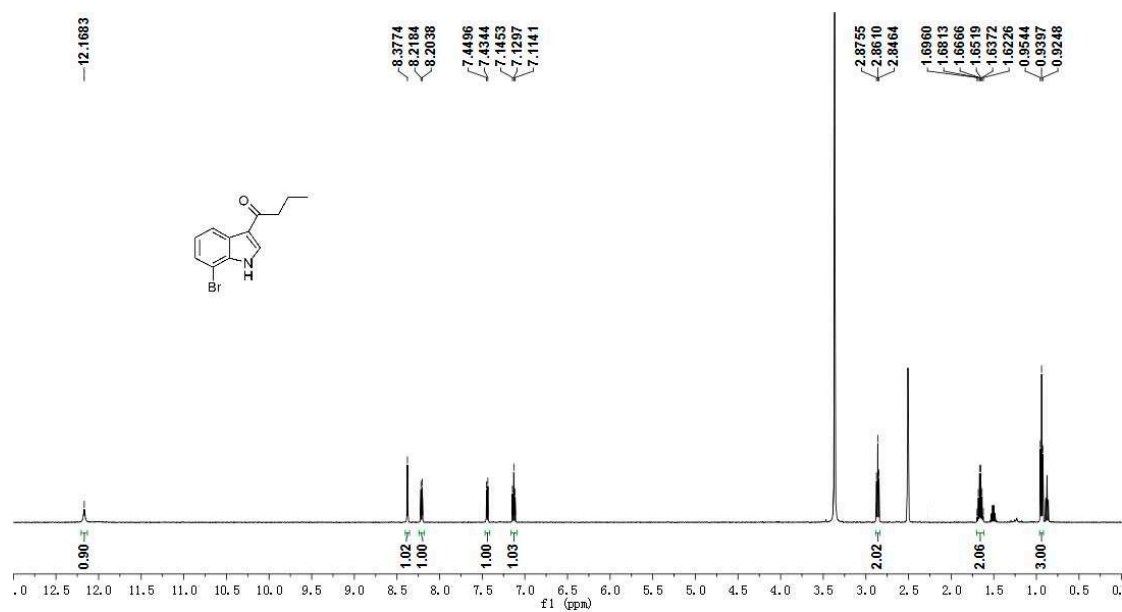

<sup>13</sup>C NMR spectra (125 MHz, DMSO-*d*<sub>6</sub>) of 3jc

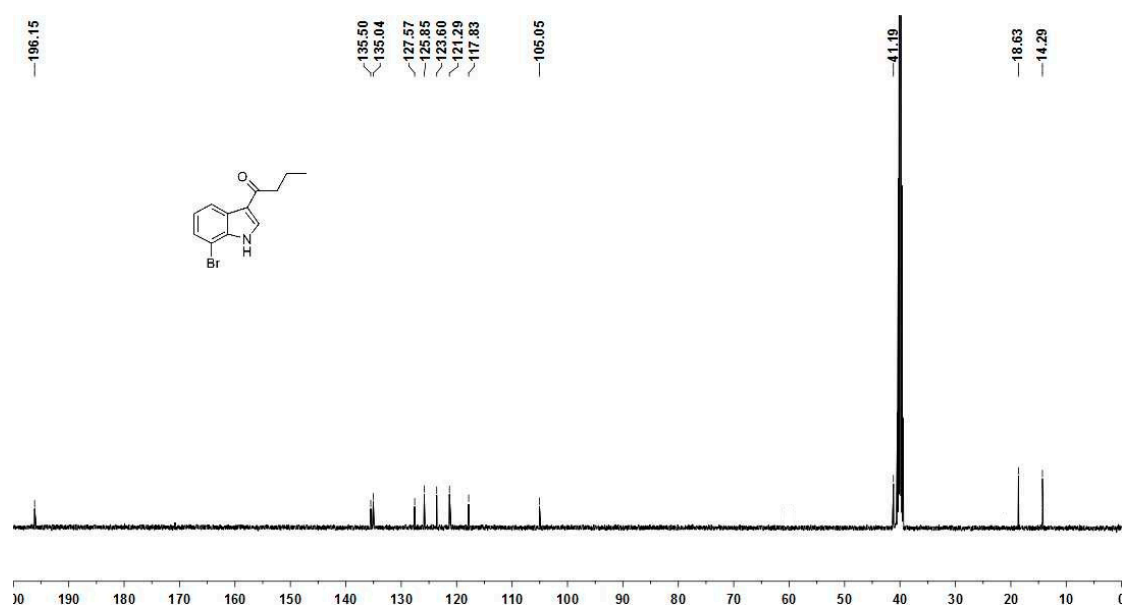



**$^1\text{H}$  NMR spectra (500 MHz,  $\text{DMSO-}d_6$ ) of 3jd**

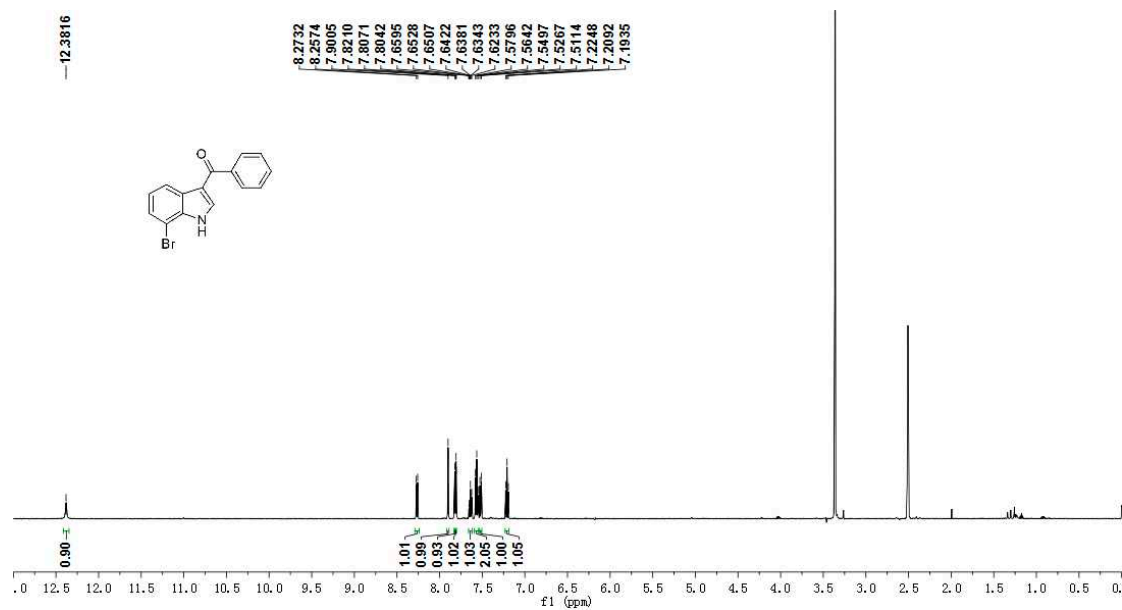

**$^{13}\text{C}$  NMR spectra (125 MHz,  $\text{DMSO-}d_6$ ) of 3jd**

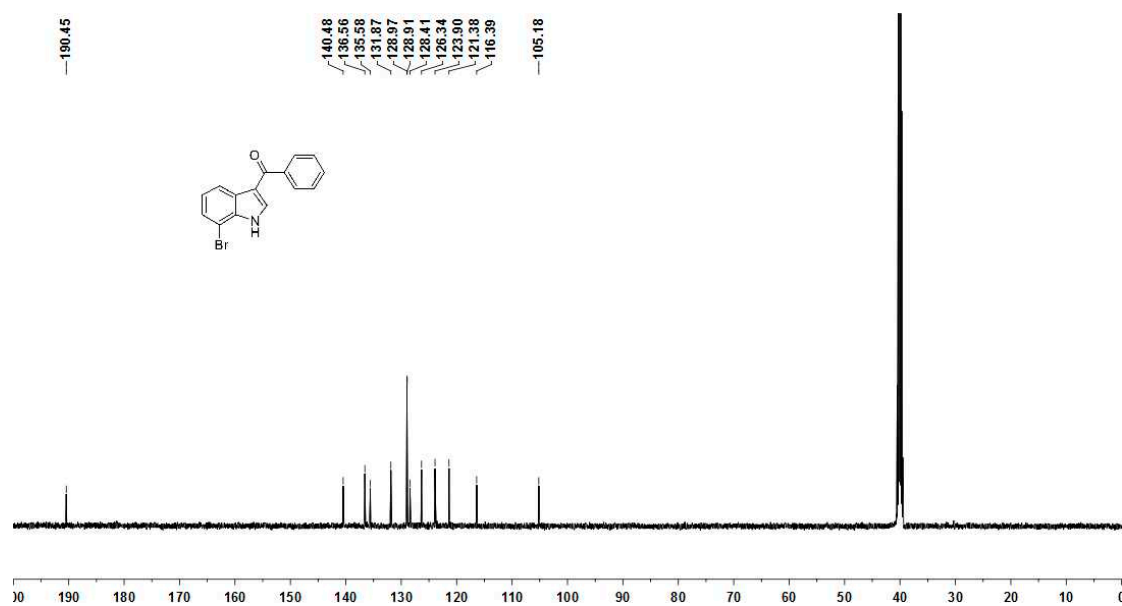

**$^1\text{H}$  NMR spectra (400 MHz,  $\text{CDCl}_3$ ) of 5**

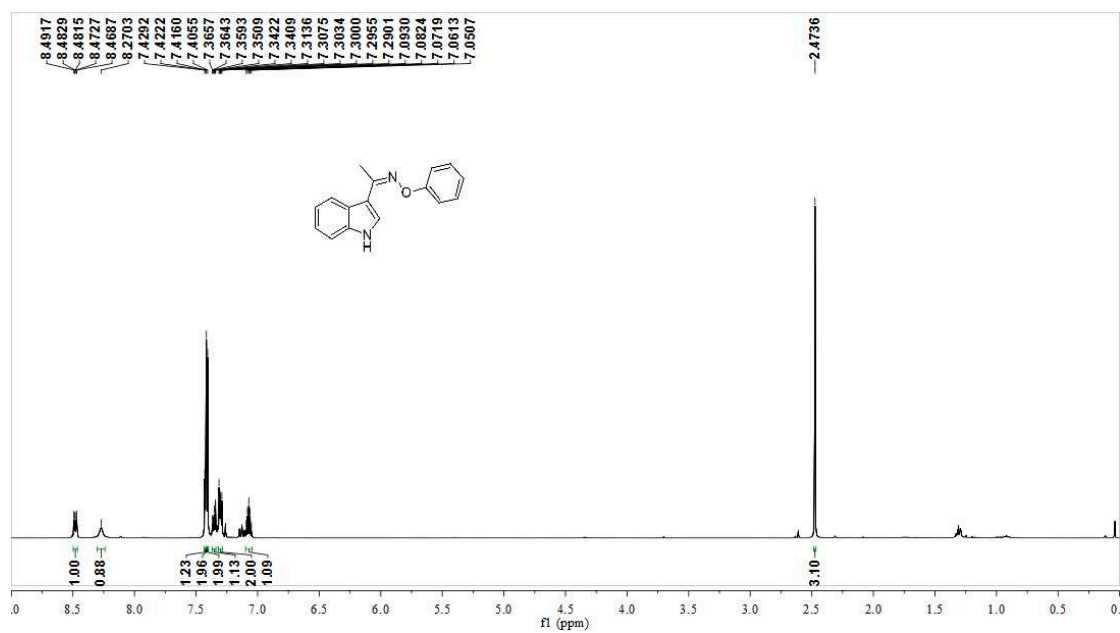

**$^{13}\text{C}$  NMR spectra (100 MHz,  $\text{CDCl}_3$ ) of 5**

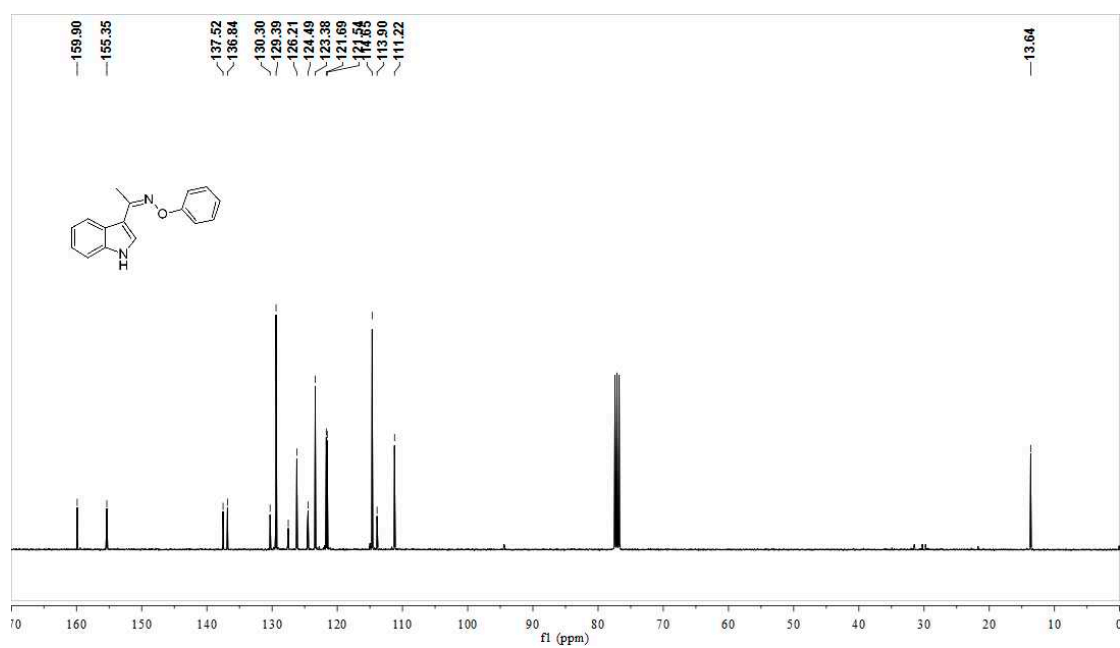

**$^1\text{H}$  NMR spectra (500 MHz,  $\text{CDCl}_3$ ) of 6**

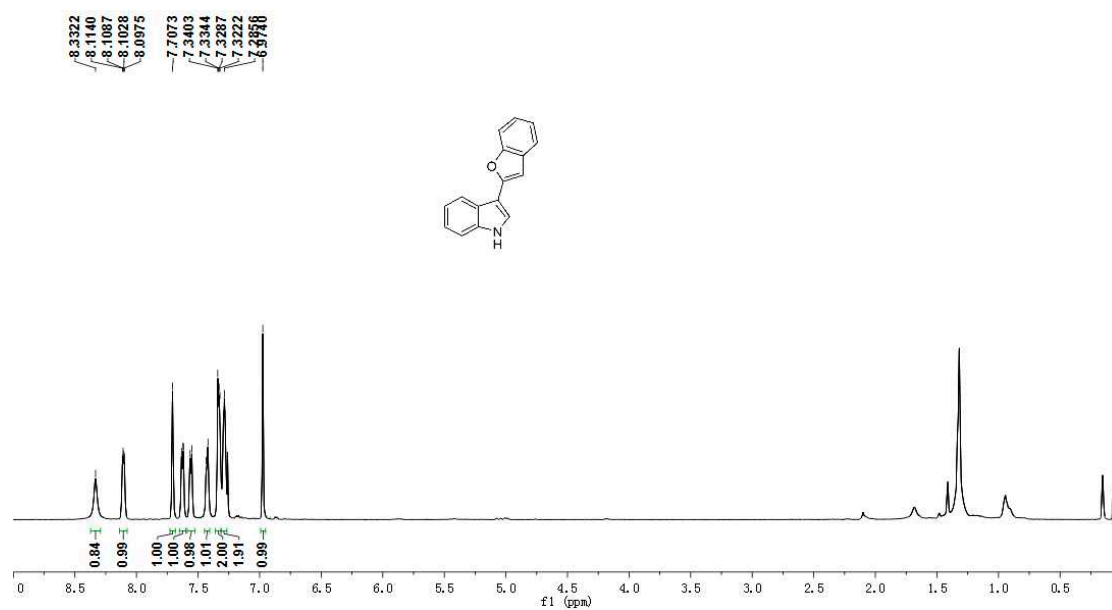

**$^{13}\text{C}$  NMR spectra (125 MHz,  $\text{CDCl}_3$ ) of 6**

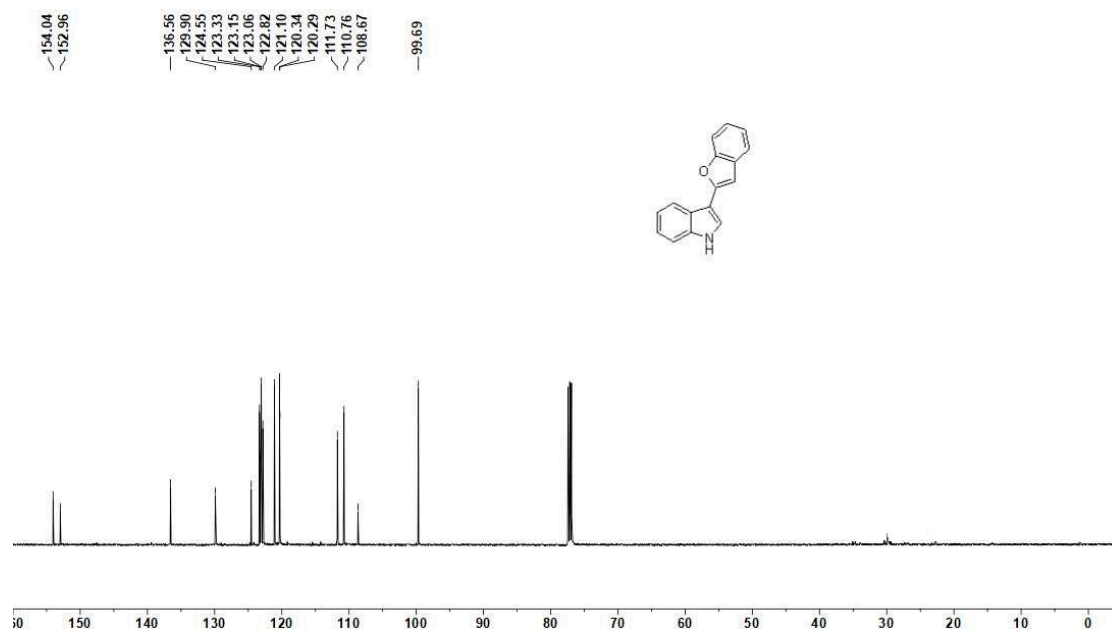

**Single-Crystal X-Ray Structure of 3ec (CCDC: 1441923)**

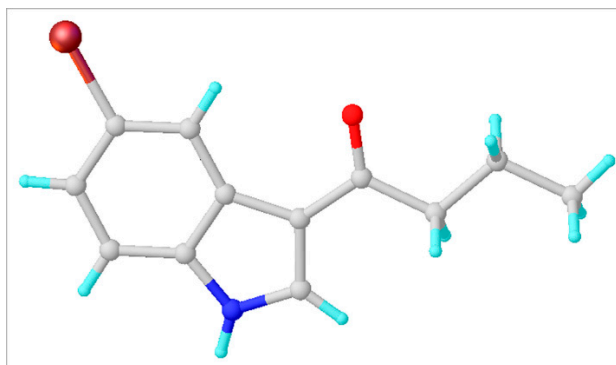

**Table S1** Crystal data and structure refinement for **3ec**.

|                                             |                                                               |
|---------------------------------------------|---------------------------------------------------------------|
| Identification code                         | <b>3ec</b>                                                    |
| Empirical formula                           | C <sub>12</sub> H <sub>12</sub> BrNO                          |
| Formula weight                              | 266.14                                                        |
| Temperature/K                               | 296.15                                                        |
| Crystal system                              | triclinic                                                     |
| Space group                                 | P-1                                                           |
| a/Å                                         | 7.274(3)                                                      |
| b/Å                                         | 7.359(3)                                                      |
| c/Å                                         | 11.247(5)                                                     |
| α/°                                         | 85.412(7)                                                     |
| β/°                                         | 87.981(7)                                                     |
| γ/°                                         | 69.479(7)                                                     |
| Volume/Å <sup>3</sup>                       | 562.1(4)                                                      |
| Z                                           | 2                                                             |
| Q <sub>calc</sub> /cm <sup>3</sup>          | 1.572                                                         |
| μ/mm <sup>-1</sup>                          | 3.629                                                         |
| F(000)                                      | 268.0                                                         |
| Crystal size/mm <sup>3</sup>                | 0.21 × 0.19 × 0.18                                            |
| Radiation                                   | MoKα (λ = 0.71073)                                            |
| 2θ range for data collection/°              | 3.64 to 53.36                                                 |
| Index ranges                                | −9 ≤ h ≤ 9, −9 ≤ k ≤ 9, −14 ≤ l ≤ 14                          |
| Reflections collected                       | 6660                                                          |
| Independent reflections                     | 2357 [R <sub>int</sub> = 0.0334, R <sub>sigma</sub> = 0.0404] |
| Data/restraints/parameters                  | 2357/0/137                                                    |
| Goodness-of-fit on F <sup>2</sup>           | 0.841                                                         |
| Final R indexes [I ≥ 2σ (I)]                | R <sub>1</sub> = 0.0371, wR <sub>2</sub> = 0.1121             |
| Final R indexes [all data]                  | R <sub>1</sub> = 0.0590, wR <sub>2</sub> = 0.1281             |
| Largest diff. peak/hole / e Å <sup>-3</sup> | 0.55/−0.34                                                    |

**Table S2** Fractional Atomic Coordinates ( $\times 10^4$ ) and Equivalent Isotropic Displacement Parameters ( $\text{\AA}^2 \times 10^3$ ) for **3ec**.  $U_{eq}$  is defined as 1/3 of the trace of the orthogonalised  $U_{ij}$  tensor.

|     | $x$       | $y$       | $z$       | $U_{eq}$ |
|-----|-----------|-----------|-----------|----------|
| Br1 | 2740.8(6) | 2814.7(6) | 5075.3(3) | 72.1(2)  |
| O1  | 2538(4)   | 37(3)     | 9744(2)   | 48.1(6)  |
| N1  | 2633(4)   | 6180(3)   | 9755(2)   | 41.8(6)  |
| C6  | 2628(4)   | 3761(4)   | 8657(3)   | 35.4(6)  |
| C7  | 2502(4)   | 3187(4)   | 9902(3)   | 33.8(6)  |
| C5  | 2623(4)   | 2905(4)   | 7594(3)   | 40.7(7)  |
| C1  | 2731(4)   | 5639(4)   | 8607(3)   | 38.1(7)  |
| C11 | 1949(5)   | -869(5)   | 12151(3)  | 45.6(7)  |
| C10 | 2374(5)   | 959(4)    | 11745(3)  | 42.0(7)  |
| C8  | 2509(4)   | 4722(4)   | 10522(3)  | 39.9(7)  |
| C12 | 1679(7)   | -1101(6)  | 13496(3)  | 63.7(10) |
| C3  | 2928(5)   | 5770(5)   | 6494(3)   | 52.3(8)  |
| C4  | 2761(5)   | 3927(5)   | 6542(3)   | 47.4(7)  |
| C2  | 2916(5)   | 6635(4)   | 7535(3)   | 47.8(8)  |
| C9  | 2475(4)   | 1308(4)   | 10411(3)  | 36.0(6)  |

**Table S3** Anisotropic Displacement Parameters ( $\text{\AA}^2 \times 10^3$ ) for **3ec**. The Anisotropic displacement factor exponent takes the form:  $-2\pi^2[h^2a^{*2}U_{11}+2hka^*b^*U_{12}+\dots]$ .

|     | $U_{11}$ | $U_{33}$ | $U_{23}$ | $U_{13}$ | $U_{12}$  |
|-----|----------|----------|----------|----------|-----------|
| Br1 | 93.0(4)  | 47.6(3)  | -17.3(2) | 6.4(2)   | -42.9(3)  |
| O1  | 78.0(15) | 46.3(13) | -3.5(9)  | 2.6(11)  | -26.2(10) |
| N1  | 56.4(15) | 52.2(16) | -3.7(10) | -2.3(12) | -20.8(11) |
| C6  | 37.0(14) | 48.0(17) | -1.1(11) | 0.0(12)  | -12.7(11) |
| C7  | 40.7(15) | 41.8(16) | -1.1(11) | -0.3(12) | -13.7(11) |
| C5  | 46.9(16) | 47.3(18) | -5.3(12) | 1.5(13)  | -17.5(13) |
| C1  | 41.4(16) | 50.1(18) | -2.0(12) | -3.0(13) | -15.0(12) |
| C11 | 59.5(19) | 43.1(18) | 5.6(13)  | -4.3(14) | -24.7(15) |
| C10 | 53.1(18) | 44.7(17) | -2.7(12) | 0.5(13)  | -18.7(13) |
| C8  | 48.4(17) | 45.1(17) | -2.6(12) | 0.9(13)  | -19.5(13) |
| C12 | 91(3)    | 45(2)    | 9.3(17)  | -3.7(18) | -41(2)    |
| C3  | 63(2)    | 49(2)    | 14.0(15) | -0.4(15) | -26.2(16) |
| C4  | 51.4(18) | 43.9(18) | -4.9(14) | 3.0(14)  | -20.5(15) |
| C2  | 62(2)    | 54(2)    | 7.2(14)  | -2.9(16) | -26.1(15) |
| C9  | 41.5(15) | 45.4(17) | -0.2(12) | 0.0(12)  | -15.0(11) |

**Table S4** Bond Lengths for **3ec**.

| Length/Å |    |          | Length/Å |     |          |
|----------|----|----------|----------|-----|----------|
| Br1      | C4 | 1.901(4) | C7       | C9  | 1.460(4) |
| O1       | C9 | 1.233(4) | C5       | C4  | 1.371(4) |
| N1       | C1 | 1.373(4) | C1       | C2  | 1.388(4) |
| N1       | C8 | 1.348(4) | C11      | C10 | 1.516(4) |
| C6       | C7 | 1.440(4) | C11      | C12 | 1.522(5) |
| C6       | C5 | 1.395(4) | C10      | C9  | 1.505(4) |
| C6       | C1 | 1.407(4) | C3       | C4  | 1.401(5) |
| C7       | C8 | 1.375(4) | C3       | C2  | 1.375(5) |

**Table S5** Bond Angles for **3ec**.

| Angle/° |    |    |          | Angle/° |     |     |          |
|---------|----|----|----------|---------|-----|-----|----------|
| C8      | N1 | C1 | 109.5(2) | C10     | C11 | C12 | 113.0(3) |
| C5      | C6 | C7 | 134.7(3) | C9      | C10 | C11 | 114.0(3) |
| C5      | C6 | C1 | 119.1(3) | N1      | C8  | C7  | 110.0(3) |
| C1      | C6 | C7 | 106.1(3) | C2      | C3  | C4  | 119.6(3) |
| C6      | C7 | C9 | 126.7(2) | C5      | C4  | Br1 | 119.3(2) |
| C8      | C7 | C6 | 106.5(2) | C5      | C4  | C3  | 122.8(3) |
| C8      | C7 | C9 | 126.7(3) | C3      | C4  | Br1 | 117.9(3) |
| C4      | C5 | C6 | 118.1(3) | C3      | C2  | C1  | 118.3(3) |
| N1      | C1 | C6 | 107.9(3) | O1      | C9  | C7  | 119.6(3) |
| N1      | C1 | C2 | 130.1(3) | O1      | C9  | C10 | 121.2(3) |
| C2      | C1 | C6 | 122.0(3) | C7      | C9  | C10 | 119.2(2) |

**Table S6** Hydrogen Atom Coordinates (Å×10<sup>4</sup>) and Isotropic Displacement Parameters (Å<sup>2</sup>×10<sup>3</sup>) for **3ec**.

|      | <i>x</i> | <i>y</i> | <i>z</i> | U(eq) |
|------|----------|----------|----------|-------|
| H1   | 2648     | 7279     | 9953     | 50    |
| H5   | 2528     | 1676     | 7600     | 49    |
| H11A | 3023     | −1992    | 11901    | 55    |
| H11B | 768      | −839     | 11762    | 55    |
| H10A | 1358     | 2068     | 12058    | 50    |
| H10B | 3613     | 874      | 12082    | 50    |
| H8   | 2438     | 4751     | 11347    | 48    |
| H12A | 1452     | −2296    | 13704    | 96    |
| H12B | 575      | −29      | 13745    | 96    |
| H12C | 2840     | −1125    | 13887    | 96    |
| H3   | 3046     | 6406     | 5762     | 63    |
| H2   | 3029     | 7857     | 7521     | 57    |
